# Supplementary material for: Integration of Neighbor Topologies Based on Meta-Paths and Node Attributes for Predicting Drug-Related Diseases
Source: MDPI journal article supplement (doi:10.3390/ijms23073870), 2022-03-31
Supplement: s1 [file s1]

**Supplementary Table S1.** Average AUC and AUPR for different folds of cross-validations.

|              | 5-fold cross-validation | 10-fold cross-validation |
|--------------|-------------------------|--------------------------|
| Average AUC  | 0.978                   | 0.986                    |
| Average AUPR | 0.391                   | 0.404                    |
