# Supplementary material for: Integration of Neighbor Topologies Based on Meta-Paths and Node Attributes for Predicting Drug-Related Diseases
Source: MDPI journal article supplement (doi:10.3390/ijms23073870), 2022-03-31
Supplement: s1 [file s1]

**Supplementary Table S2.** Top 10 drug candidates related to betamethasone, acetaminophen, etoposide, flurbiprofen and verapamil.

| Drug Name     | Rank | Disease name                   | Description                                                    | Rank   | Disease name                                      | Description                                             |
|---------------|------|--------------------------------|----------------------------------------------------------------|--------|---------------------------------------------------|---------------------------------------------------------|
| betamethasone | 1    | Inflammation                   | CTD, DrugBank, PubChem,                                        | 6      | Psoriasis                                         | CTD, DrugBank,                                          |
|               | 2    | Scalp Dermatoses               | ClinicalTrials<br>DrugBank, PubChem,                           | 7      | Pruritus                                          | PubChem,<br>ClinicalTrials<br>CTD, DrugBank,<br>PubChem |
|               | 3    | Foot Dermatoses                | ClinicalTrials<br>DrugBank                                     | 8      | Skin Diseases,<br>Eczematous                      | CTD, DrugBank,<br>PubChem,<br>ClinicalTrials            |
|               | 4    | Facial Dermatoses              | CTD, DrugBank,<br>PubChem                                      | 9      | Acne Vulgaris                                     | CTD                                                     |
|               | 5    | Skin Diseases                  | CTD, DrugBank,<br>PubChem                                      | 10     | Dermatitis                                        | CTD, DrugBank,<br>PubChem,<br>ClinicalTrials            |
| acetaminophen | 1    | Osteoarthritis                 | CTD, DrugBank,<br>PubChem,                                     | 6      | Arthritis,                                        | CTD, PubChem                                            |
|               | 2    | Fever                          | ClinicalTrials<br>CTD, DrugBank,<br>PubChem,<br>ClinicalTrials | 7      | Juvenile Rheumatoid<br>Spondylitis,<br>Ankylosing | CTD, DrugBank,<br>PubChem                               |
|               | 3    | Arthritis, Rheumatoid          | CTD, DrugBank,<br>PubChem,<br>ClinicalTrials                   | 8      | Pain, Postoperative                               | CTD, DrugBank,<br>PubChem,<br>ClinicalTrials            |
|               | 4    | Inflammation                   | CTD, PubChem                                                   | 9      | Gout                                              | CTD, PubChem                                            |
|               | 5    | Dysmenorrhea                   | CTD, DrugBank,<br>PubChem                                      | 10     | Asthma                                            | CTD                                                     |
| etoposide     | 1    | Urinary Tract Infections       | CTD                                                            | 6      | Trophoblastic Neoplasms                           | DrugBank, PubChem                                       |
|               | 2    | Lymphoma                       | CTD, DrugBank,<br>PubChem,<br>ClinicalTrials                   | 7      | Sarcoma                                           | CTD, DrugBank,<br>PubChem,<br>ClinicalTrials            |
|               | 3    | Bronchitis                     | CTD                                                            | 8      | Precursor Cell Lymphoblastic Leukemia-Lymphoma    | CTD                                                     |
|               | 4    | Leukemia, Lymphoid             | CTD, DrugBank,<br>PubChem,<br>ClinicalTrials                   | 9      | Neoplasms                                         | CTD, DrugBank,<br>PubChem,<br>ClinicalTrials            |
|               | 5    | Breast Neoplasms               | CTD, PubChem,<br>ClinicalTrials                                | 10     | Escherichia coli Infections                       | CTD                                                     |
| flurbiprofen  | 1    | Pain                           | CTD, DrugBank,<br>PubChem,<br>ClinicalTrials                   | 6      | Gout                                              | CTD, PubChem                                            |
|               | 2    | Arthritis, Juvenile Rheumatoid | CTD, DrugBank,<br>PubChem                                      | 7<br>8 | Photophobia<br>Pain, Postoperative                | PubChem<br>CTD, DrugBank,                               |

|               |   |                                  |                                                        |    |                      |                                 |
|---------------|---|----------------------------------|--------------------------------------------------------|----|----------------------|---------------------------------|
|               | 3 | Dysmenorrhea                     | DrugBank, PubChem                                      |    |                      | PubChem,<br>ClinicalTrials      |
|               | 4 | Fever                            | CTD, PubChem                                           | 9  | Bursitis             | PubChem                         |
|               | 5 | Spondylitis,<br>Ankylosing       | CTD, DrugBank,<br>PubChem                              | 10 | Arthritis            | CTD, PubChem,<br>ClinicalTrials |
| verapa<br>mil | 1 | Atrial Fibrillation              | CTD, PubChem,                                          | 6  | Pain                 | CTD, PubChem                    |
|               | 2 | Hypertension                     | ClinicalTrials<br>CTD, DrugBank,<br>PubChem,           | 7  | Angina Pectoris      | CTD, DrugBank,<br>PubChem       |
|               | 3 | Tachycardia,<br>Supraventricular | ClinicalTrials<br>DrugBank, PubChem,<br>ClinicalTrials | 8  | Arrhythmias, Cardiac | CTD, DrugBank,<br>PubChem       |
|               | 4 | Angina Pectoris,<br>Variant      | unconfirmed                                            | 9  | Asthma               | CTD, PubChem                    |
|               | 5 | Ventricular<br>Fibrillation      | CTD, PubChem                                           | 10 | Schizophrenia        | CTD, PubChem                    |
