# Supplementary material for: Integration of Neighbor Topologies Based on Meta-Paths and Node Attributes for Predicting Drug-Related Diseases
Source: Int J Mol Sci. 2022 Mar 31;23(7):3870. doi: 10.3390/ijms23073870 (PMC8999005; doi:10.3390/ijms23073870)
Supplement: Supplementary file 1 [file ijms-23-03870-s001.zip › S3.xls]

## Sheet: Sheet2
Drug name	Candidate disease name	Rank	Association score
6-aminocaproic acid	Postoperative Complications	1	0.259772
6-aminocaproic acid	Ascites	2	0.237736
6-aminocaproic acid	Subarachnoid Hemorrhage	3	0.234649
6-aminocaproic acid	Purpura	4	0.219481
6-aminocaproic acid	Thromboembolism	5	0.203581
6-aminocaproic acid	Thrombocytopenia	6	0.203213
6-aminocaproic acid	Leukocytosis	7	0.202469
6-aminocaproic acid	Malaria, Falciparum	8	0.202373
6-aminocaproic acid	Growth Disorders	9	0.202159
6-aminocaproic acid	Hyperbilirubinemia	10	0.201974
6-aminocaproic acid	Blood Coagulation Disorders	11	0.201761
6-aminocaproic acid	Ulcer	12	0.201756
6-aminocaproic acid	Esophageal and Gastric Varices	13	0.201609
6-aminocaproic acid	Menstruation Disturbances	14	0.201543
6-aminocaproic acid	Purpura, Thrombocytopenic, Idiopathic	15	0.200459
6-aminocaproic acid	Hypoprothrombinemias	16	0.200452
6-aminocaproic acid	Liver Cirrhosis	17	0.200297
6-aminocaproic acid	Cholelithiasis	18	0.200194
6-aminocaproic acid	Emaciation	19	0.200171
6-aminocaproic acid	Esophageal Spasm, Diffuse	20	0.200161
6-aminocaproic acid	Giardiasis	21	0.200124
6-aminocaproic acid	Colonic Diseases	22	0.200113
6-aminocaproic acid	Rectal Neoplasms	23	0.200111
6-aminocaproic acid	Colonic Diseases, Functional	24	0.200103
6-aminocaproic acid	Gout	25	0.200098
6-aminocaproic acid	Radiation Injuries, Experimental	26	0.200097
6-aminocaproic acid	Obesity	27	0.200087
6-aminocaproic acid	Cryptosporidiosis	28	0.200087
6-aminocaproic acid	Coronary Disease	29	0.200068
6-aminocaproic acid	Hepatic Encephalopathy	30	0.200047
abacavir	Acquired Immunodeficiency Syndrome	1	0.999979
abacavir	Urinary Tract Infections	2	0.200006
abacavir	Tinea Pedis	3	0.177226
abacavir	Herpes Genitalis	4	0.136076
abacavir	Tinea Versicolor	5	0.1004
abacavir	Escherichia coli Infections	6	0.0969626
abacavir	Skin Diseases, Infectious	7	0.0811268
abacavir	Staphylococcal Skin Infections	8	0.044032
abacavir	Diabetes Mellitus, Type 2	9	0.0326026
abacavir	Giardiasis	10	0.0272974
abacavir	Candidiasis, Vulvovaginal	11	0.0163532
abacavir	Gonorrhea	12	0.0118909
abacavir	Diabetic Nephropathies	13	0.00771466
abacavir	AIDS-Related Opportunistic Infections	14	0.0064314
abacavir	Bronchitis	15	0.00288426
abacavir	Staphylococcal Infections	16	0.00253051
abacavir	Gram-Positive Bacterial Infections	17	0.00107807
abacavir	Gram-Negative Bacterial Infections	18	0.000941071
abacavir	Candidiasis, Cutaneous	19	0.000919073
abacavir	Skin Diseases, Bacterial	20	0.000666805
abacavir	Gout	21	0.000324072
abacavir	Malaria, Falciparum	22	0.000323971
abacavir	Hypercholesterolemia	23	0.000244397
abacavir	Osteoarthritis	24	0.000204163
abacavir	Warts	25	0.000195442
abacavir	Acanthamoeba Keratitis	26	0.000190153
abacavir	Helicobacter Infections	27	0.000138341
abacavir	Tinea Capitis	28	0.000123281
abacavir	Rhinitis, Vasomotor	29	8.89828e-05
abacavir	Hypertension	30	8.64446e-05
acarbose	Diabetes Mellitus, Type 2	1	0.212548
acarbose	Tinea Pedis	2	0.184047
acarbose	Gout	3	0.163434
acarbose	Urinary Tract Infections	4	0.147589
acarbose	Rhinitis, Vasomotor	5	0.12391
acarbose	Malaria, Falciparum	6	0.119316
acarbose	Thromboembolism	7	0.11053
acarbose	Staphylococcal Skin Infections	8	0.0714709
acarbose	Postoperative Complications	9	0.0622031
acarbose	Tinea Versicolor	10	0.0500718
acarbose	Osteoporosis, Postmenopausal	11	0.0419477
acarbose	Skin Diseases, Infectious	12	0.033269
acarbose	Osteoarthritis	13	0.0331571
acarbose	Thrombocytopenia	14	0.0271898
acarbose	Hypertension	15	0.0243525
acarbose	Hepatic Encephalopathy	16	0.0213134
acarbose	Hypertension, Malignant	17	0.0168713
acarbose	Multiple Myeloma	18	0.0148917
acarbose	Parkinson Disease, Postencephalitic	19	0.0101464
acarbose	Hypercholesterolemia	20	0.00798512
acarbose	Giardiasis	21	0.00785338
acarbose	Neutropenia	22	0.00706702
acarbose	Coronary Disease	23	0.00625597
acarbose	Cryptosporidiosis	24	0.00597713
acarbose	Toxoplasmosis	25	0.00556346
acarbose	Psoriasis	26	0.00535246
acarbose	Asthma	27	0.00418337
acarbose	Angina Pectoris	28	0.00410259
acarbose	Dysentery	29	0.00402251
acarbose	Endocarditis	30	0.00369868
acebutolol	Asthma	1	1
acebutolol	Heart Failure	2	0.999999
acebutolol	Tachycardia, Supraventricular	3	0.999998
acebutolol	Pain	4	0.775115
acebutolol	Glaucoma, Open-Angle	5	0.681848
acebutolol	Bronchial Spasm	6	0.66755
acebutolol	Atrial Fibrillation	7	0.203313
acebutolol	Atrial Flutter	8	0.202996
acebutolol	Ventricular Dysfunction, Left	9	0.19999
acebutolol	Nausea	10	0.199985
acebutolol	Schizophrenia	11	0.199962
acebutolol	Edema	12	0.199581
acebutolol	Parkinson Disease	13	0.199502
acebutolol	Vomiting	14	0.199285
acebutolol	Inflammation	15	0.198903
acebutolol	Angina Pectoris, Variant	16	0.19828
acebutolol	Nephrotic Syndrome	17	0.198168
acebutolol	Abnormalities, Drug-Induced	18	0.19701
acebutolol	Heart Block	19	0.195889
acebutolol	Cardiac Output, Low	20	0.193202
acebutolol	Hemorrhoids	21	0.192431
acebutolol	Fissure in Ano	22	0.191612
acebutolol	Heart Arrest	23	0.189772
acebutolol	Bipolar Disorder	24	0.186288
acebutolol	Arrhythmias, Cardiac	25	0.183701
acebutolol	Hypertension, Malignant	26	0.179872
acebutolol	Psychotic Disorders	27	0.173396
acebutolol	Bradycardia	28	0.173126
acebutolol	Conjunctivitis, Allergic	29	0.148381
acebutolol	Raynaud Disease	30	0.14536
acetaminophen	Osteoarthritis	1	0.999984
acetaminophen	Fever	2	0.999249
acetaminophen	Arthritis, Rheumatoid	3	0.998064
acetaminophen	Inflammation	4	0.997544
acetaminophen	Dysmenorrhea	5	0.994791
acetaminophen	Arthritis, Juvenile Rheumatoid	6	0.850496
acetaminophen	Spondylitis, Ankylosing	7	0.785819
acetaminophen	Pain, Postoperative	8	0.324118
acetaminophen	Gout	9	0.276478
acetaminophen	Asthma	10	0.199964
acetaminophen	Hypertension	11	0.199732
acetaminophen	Pruritus	12	0.19972
acetaminophen	Schizophrenia	13	0.198901
acetaminophen	Sleep Initiation and Maintenance Disorders	14	0.19714
acetaminophen	Angina Pectoris	15	0.193352
acetaminophen	Photophobia	16	0.189502
acetaminophen	Nausea	17	0.171407
acetaminophen	Alcoholism	18	0.141667
acetaminophen	Psychomotor Agitation	19	0.123392
acetaminophen	Bipolar Disorder	20	0.11755
acetaminophen	Parkinson Disease	21	0.11718
acetaminophen	Vomiting	22	0.0813699
acetaminophen	Urinary Tract Infections	23	0.0688853
acetaminophen	Depressive Disorder	24	0.0657565
acetaminophen	Fatigue	25	0.0594126
acetaminophen	Conjunctivitis, Allergic	26	0.058191
acetaminophen	Cough	27	0.0559044
acetaminophen	Opioid-Related Disorders	28	0.0525308
acetaminophen	Tourette Syndrome	29	0.0380881
acetaminophen	Angina Pectoris, Variant	30	0.037129
acetazolamide	Nephrotic Syndrome	1	0.49431
acetazolamide	Edema	2	0.409495
acetazolamide	Glaucoma, Open-Angle	3	0.353387
acetazolamide	Asthma	4	0.199988
acetazolamide	Diabetes Mellitus, Type 2	5	0.199976
acetazolamide	Respiration Disorders	6	0.199471
acetazolamide	Alcoholism	7	0.198071
acetazolamide	Schizophrenia	8	0.19528
acetazolamide	Pain	9	0.194758
acetazolamide	Drug Toxicity	10	0.185201
acetazolamide	Respiratory Tract Diseases	11	0.17875
acetazolamide	Glaucoma, Angle-Closure	12	0.173163
acetazolamide	Hypertension	13	0.170832
acetazolamide	Hepatic Encephalopathy	14	0.169751
acetazolamide	Airway Obstruction	15	0.166774
acetazolamide	Respiratory Distress Syndrome, Adult	16	0.150436
acetazolamide	Alzheimer Disease	17	0.146088
acetazolamide	Bipolar Disorder	18	0.143243
acetazolamide	Hypertension, Pulmonary	19	0.134409
acetazolamide	Cough	20	0.115015
acetazolamide	Respiratory Distress Syndrome, Newborn	21	0.110802
acetazolamide	Apnea	22	0.106058
acetazolamide	Parkinson Disease	23	0.0929226
acetazolamide	Pulmonary Edema	24	0.0876943
acetazolamide	Malaria, Falciparum	25	0.0402034
acetazolamide	Psoriasis	26	0.0311128
acetazolamide	Hypertension, Malignant	27	0.0293244
acetazolamide	Depressive Disorder	28	0.0290969
acetazolamide	Constipation	29	0.022974
acetazolamide	Angina Pectoris	30	0.0205283
acetohexamide	Hypertension, Malignant	1	0.177094
acetohexamide	Urinary Tract Infections	2	0.17475
acetohexamide	Hypertension	3	0.137196
acetohexamide	Rhinitis, Vasomotor	4	0.0192266
acetohexamide	Tinea Pedis	5	0.0107584
acetohexamide	Gout	6	0.00955411
acetohexamide	Skin Diseases, Infectious	7	0.00937097
acetohexamide	Thromboembolism	8	0.00772656
acetohexamide	Diabetic Nephropathies	9	0.00509504
acetohexamide	Malaria, Falciparum	10	0.00433772
acetohexamide	Tinea Versicolor	11	0.00427677
acetohexamide	Staphylococcal Skin Infections	12	0.00246695
acetohexamide	Hypercholesterolemia	13	0.00145728
acetohexamide	Hepatic Encephalopathy	14	0.000312016
acetohexamide	Alopecia	15	0.000294319
acetohexamide	Psoriasis	16	0.000232475
acetohexamide	Toxoplasmosis	17	0.00023021
acetohexamide	Gram-Positive Bacterial Infections	18	0.000145581
acetohexamide	Myocardial Infarction	19	0.000125463
acetohexamide	Puberty, Precocious	20	0.000108112
acetohexamide	Osteoarthritis	21	0.000101405
acetohexamide	Candidiasis, Cutaneous	22	9.7694e-05
acetohexamide	Tetanus	23	9.71264e-05
acetohexamide	Hypoglycemia	24	9.63247e-05
acetohexamide	Osteoporosis, Postmenopausal	25	9.53889e-05
acetohexamide	Escherichia coli Infections	26	9.43346e-05
acetohexamide	Coronary Artery Disease	27	9.12973e-05
acetohexamide	Prostatic Hyperplasia	28	9.05433e-05
acetohexamide	Respiratory Tract Infections	29	8.84857e-05
acetohexamide	Toxoplasmosis, Cerebral	30	8.25477e-05
acitretin	Acne Vulgaris	1	0.710225
acitretin	Diabetes Mellitus, Type 2	2	0.199694
acitretin	Asthma	3	0.199525
acitretin	Paget Disease, Extramammary	4	0.188212
acitretin	Tinea Pedis	5	0.187396
acitretin	Schizophrenia	6	0.183361
acitretin	Breast Neoplasms	7	0.174049
acitretin	Rhinitis, Vasomotor	8	0.171141
acitretin	Malaria, Falciparum	9	0.165008
acitretin	Pain	10	0.164871
acitretin	Osteoporosis, Postmenopausal	11	0.158282
acitretin	Gout	12	0.134392
acitretin	Glaucoma, Open-Angle	13	0.133993
acitretin	Rhinitis, Allergic, Perennial	14	0.112186
acitretin	Graft vs Host Disease	15	0.0889977
acitretin	Sarcoma	16	0.0772804
acitretin	Fibrosarcoma	17	0.0772744
acitretin	Iridocyclitis	18	0.0692122
acitretin	Tinea Versicolor	19	0.0671391
acitretin	Conjunctivitis, Allergic	20	0.0656909
acitretin	Pheochromocytoma	21	0.0482843
acitretin	Osteoarthritis	22	0.0433183
acitretin	Alopecia	23	0.0432548
acitretin	Bipolar Disorder	24	0.042247
acitretin	Adrenal Cortex Neoplasms	25	0.0388008
acitretin	Melanoma	26	0.034154
acitretin	Lymphoma, T-Cell, Cutaneous	27	0.0263878
acitretin	Parkinson Disease	28	0.024276
acitretin	Hypertension	29	0.0231369
acitretin	Urinary Tract Infections	30	0.0216262
acyclovir	AIDS-Related Opportunistic Infections	1	0.998281
acyclovir	Herpes Zoster	2	0.98939
acyclovir	Cytomegalovirus Retinitis	3	0.977058
acyclovir	Keratitis, Herpetic	4	0.955919
acyclovir	Epstein-Barr Virus Infections	5	0.787447
acyclovir	Herpes Zoster Ophthalmicus	6	0.786901
acyclovir	Herpes Labialis	7	0.355082
acyclovir	Cytomegalovirus Infections	8	0.226793
acyclovir	Virus Diseases	9	0.215912
acyclovir	Herpes Simplex	10	0.207559
acyclovir	Condylomata Acuminata	11	0.200421
acyclovir	Urinary Tract Infections	12	0.20036
acyclovir	Warts	13	0.200268
acyclovir	Skin Diseases, Infectious	14	0.199817
acyclovir	Bronchitis	15	0.199054
acyclovir	Tinea Pedis	16	0.19652
acyclovir	Staphylococcal Skin Infections	17	0.196322
acyclovir	Conjunctivitis, Viral	18	0.194415
acyclovir	Helicobacter Infections	19	0.192487
acyclovir	Tinea Versicolor	20	0.190824
acyclovir	Candidiasis, Vulvovaginal	21	0.184725
acyclovir	Conjunctivitis, Acute Hemorrhagic	22	0.182534
acyclovir	Keratitis, Dendritic	23	0.174524
acyclovir	Sarcoma, Kaposi	24	0.173792
acyclovir	Trachoma	25	0.167691
acyclovir	Conjunctivitis, Bacterial	26	0.154488
acyclovir	Breast Neoplasms	27	0.149152
acyclovir	Hepatitis B	28	0.144865
acyclovir	Candidiasis, Cutaneous	29	0.141441
acyclovir	Gonorrhea	30	0.141202
adapalene	Acne Vulgaris	1	0.973553
adapalene	Psoriasis	2	0.213237
adapalene	Diabetes Mellitus, Type 2	3	0.200035
adapalene	Breast Neoplasms	4	0.199539
adapalene	Asthma	5	0.195938
adapalene	Paget Disease, Extramammary	6	0.190923
adapalene	Adrenal Cortex Neoplasms	7	0.177389
adapalene	Schizophrenia	8	0.160883
adapalene	Iridocyclitis	9	0.147905
adapalene	Pheochromocytoma	10	0.142225
adapalene	Malaria, Falciparum	11	0.140543
adapalene	Glaucoma, Open-Angle	12	0.139395
adapalene	Puberty, Precocious	13	0.135519
adapalene	Tinea Pedis	14	0.135208
adapalene	Sarcoma	15	0.12952
adapalene	Graft vs Host Disease	16	0.114053
adapalene	Osteoporosis, Postmenopausal	17	0.10887
adapalene	Uterine Neoplasms	18	0.0929611
adapalene	Cushing Syndrome	19	0.0913631
adapalene	Gout	20	0.0876273
adapalene	Lymphoma, T-Cell, Cutaneous	21	0.0858084
adapalene	Rhinitis, Vasomotor	22	0.0735681
adapalene	Prostatic Hyperplasia	23	0.073426
adapalene	Melanoma	24	0.0725925
adapalene	Prostatic Neoplasms	25	0.0610308
adapalene	Thyroid Neoplasms	26	0.0526767
adapalene	Rhinitis, Allergic, Perennial	27	0.0450277
adapalene	Fibrosarcoma	28	0.0351623
adapalene	Leukemia, Promyelocytic, Acute	29	0.0347274
adapalene	Respiratory Tract Diseases	30	0.03041
adefovir	Herpes Zoster	1	0.200292
adefovir	Cytomegalovirus Retinitis	2	0.200066
adefovir	Virus Diseases	3	0.200014
adefovir	Herpes Genitalis	4	0.200013
adefovir	AIDS-Related Opportunistic Infections	5	0.200011
adefovir	Giardiasis	6	0.199996
adefovir	Tinea Pedis	7	0.199958
adefovir	Cryptosporidiosis	8	0.199882
adefovir	Chickenpox	9	0.199833
adefovir	Epstein-Barr Virus Infections	10	0.199719
adefovir	Cytomegalovirus Infections	11	0.199667
adefovir	Urinary Tract Infections	12	0.199614
adefovir	Herpes Zoster Ophthalmicus	13	0.199453
adefovir	Staphylococcal Skin Infections	14	0.199271
adefovir	Skin Diseases, Infectious	15	0.19924
adefovir	Tinea Versicolor	16	0.198948
adefovir	Condylomata Acuminata	17	0.19868
adefovir	Acquired Immunodeficiency Syndrome	18	0.198636
adefovir	Herpes Simplex	19	0.197889
adefovir	Diabetes Mellitus, Type 2	20	0.19733
adefovir	Warts	21	0.196802
adefovir	Bronchitis	22	0.195532
adefovir	Helicobacter Infections	23	0.195429
adefovir	Adenovirus Infections, Human	24	0.194654
adefovir	Keratitis, Herpetic	25	0.194492
adefovir	Herpes Labialis	26	0.192981
adefovir	Conjunctivitis, Viral	27	0.190412
adefovir	Acanthamoeba Keratitis	28	0.189801
adefovir	Candidiasis, Vulvovaginal	29	0.189428
adefovir	Trachoma	30	0.189245
adenosine	Bradycardia	1	0.848701
adenosine	Asthma	2	0.741372
adenosine	Bronchial Spasm	3	0.349336
adenosine	Apnea	4	0.289289
adenosine	Tachycardia, Supraventricular	5	0.243119
adenosine	Pulmonary Emphysema	6	0.227041
adenosine	Heart Block	7	0.21352
adenosine	Ventricular Fibrillation	8	0.211192
adenosine	Arrhythmias, Cardiac	9	0.203341
adenosine	Pain	10	0.20309
adenosine	Rhinitis, Vasomotor	11	0.201181
adenosine	Malaria, Falciparum	12	0.200718
adenosine	Torsades de Pointes	13	0.200579
adenosine	Myocardial Infarction	14	0.200572
adenosine	Cardiac Output, Low	15	0.200471
adenosine	Sinoatrial Block	16	0.200423
adenosine	Peptic Ulcer	17	0.200342
adenosine	Heart Arrest	18	0.200307
adenosine	Angina Pectoris	19	0.200248
adenosine	Tachycardia, Ventricular	20	0.200238
adenosine	Abnormalities, Drug-Induced	21	0.200132
adenosine	Tricuspid Atresia	22	0.200121
adenosine	Necrosis	23	0.200059
adenosine	Coronary Disease	24	0.20005
adenosine	Endocarditis	25	0.200046
adenosine	Esophageal and Gastric Varices	26	0.200045
adenosine	Ventricular Premature Complexes	27	0.20003
adenosine	Hypertension	28	0.200013
adenosine	Ductus Arteriosus, Patent	29	0.199999
adenosine	Esophageal Neoplasms	30	0.199958
albendazole	Ascariasis	1	0.25362
albendazole	Malaria	2	0.235363
albendazole	Toxoplasmosis	3	0.226206
albendazole	Larva Migrans	4	0.213646
albendazole	Malaria, Falciparum	5	0.206276
albendazole	Gout	6	0.202387
albendazole	Dracunculiasis	7	0.201784
albendazole	Amebiasis	8	0.201462
albendazole	Cryptosporidiosis	9	0.201104
albendazole	Trichinellosis	10	0.200949
albendazole	Strongyloidiasis	11	0.200798
albendazole	Malaria, Vivax	12	0.200541
albendazole	Onchocerciasis	13	0.200342
albendazole	Mansonelliasis	14	0.200325
albendazole	Babesiosis	15	0.200317
albendazole	Acanthamoeba Keratitis	16	0.200311
albendazole	Malaria, Avian	17	0.200216
albendazole	Tinea Capitis	18	0.20011
albendazole	Trypanosomiasis	19	0.200075
albendazole	Leishmaniasis, Visceral	20	0.200053
albendazole	Tinea Pedis	21	0.200044
albendazole	Leishmaniasis	22	0.20004
albendazole	Lice Infestations	23	0.200015
albendazole	Scabies	24	0.20001
albendazole	Urinary Tract Infections	25	0.200008
albendazole	Dermatitis, Seborrheic	26	0.200002
albendazole	Tinea Versicolor	27	0.2
albendazole	Candidiasis, Cutaneous	28	0.2
albendazole	Skin Diseases, Infectious	29	0.2
albendazole	Acne Vulgaris	30	0.199997
albuterol	Asthma	1	1
albuterol	Hypertension	2	0.999986
albuterol	Angina Pectoris	3	0.999978
albuterol	Tachycardia, Supraventricular	4	0.999704
albuterol	Myocardial Infarction	5	0.993042
albuterol	Bronchial Spasm	6	0.971873
albuterol	Ventricular Fibrillation	7	0.965519
albuterol	Heart Failure	8	0.84576
albuterol	Glaucoma, Open-Angle	9	0.81272
albuterol	Tachycardia, Ventricular	10	0.74433
albuterol	Pain	11	0.477079
albuterol	Schizophrenia	12	0.199788
albuterol	Rhinitis, Vasomotor	13	0.199561
albuterol	Parkinson Disease	14	0.198569
albuterol	Cardiac Output, Low	15	0.196874
albuterol	Ventricular Dysfunction, Left	16	0.177914
albuterol	Urinary Retention	17	0.177616
albuterol	Inflammation	18	0.17568
albuterol	Abnormalities, Drug-Induced	19	0.170743
albuterol	Rhinitis, Allergic, Perennial	20	0.139468
albuterol	Nausea	21	0.131882
albuterol	Conjunctivitis, Allergic	22	0.11264
albuterol	Angina Pectoris, Variant	23	0.0872472
albuterol	Hypertension, Malignant	24	0.075975
albuterol	Hypertension, Pulmonary	25	0.0758326
albuterol	Atrial Flutter	26	0.0559653
albuterol	Atrial Fibrillation	27	0.0512646
albuterol	Hypotension, Orthostatic	28	0.0501779
albuterol	Heart Arrest	29	0.0447233
albuterol	Apnea	30	0.0247509
alclometasone	Leg Dermatoses	1	1
alclometasone	Scalp Dermatoses	2	1
alclometasone	Hand Dermatoses	3	0.999999
alclometasone	Skin Diseases	4	0.988804
alclometasone	Pruritus	5	0.812265
alclometasone	Acne Vulgaris	6	0.798883
alclometasone	Asthma	7	0.775747
alclometasone	Rosacea	8	0.697643
alclometasone	Skin Diseases, Eczematous	9	0.591506
alclometasone	Psoriasis	10	0.417729
alclometasone	Photosensitivity Disorders	11	0.210401
alclometasone	Rheumatic Diseases	12	0.207292
alclometasone	Adrenal Insufficiency	13	0.203036
alclometasone	Collagen Diseases	14	0.194112
alclometasone	Scleroderma, Systemic	15	0.175349
alclometasone	Hyperhidrosis	16	0.173389
alclometasone	Keratosis	17	0.171355
alclometasone	Tinea Pedis	18	0.170655
alclometasone	Mastocytosis	19	0.15267
alclometasone	Dermatitis, Seborrheic	20	0.150293
alclometasone	Gout	21	0.145808
alclometasone	Diabetes Mellitus, Type 2	22	0.130933
alclometasone	Hematologic Diseases	23	0.126639
alclometasone	Nausea	24	0.0778286
alclometasone	Addison Disease	25	0.0632954
alclometasone	Skin Diseases, Infectious	26	0.0451708
alclometasone	Hypertension	27	0.0444475
alclometasone	Pityriasis Rosea	28	0.034952
alclometasone	Edema	29	0.034044
alclometasone	Pain	30	0.0308056
alendronate	Gout	1	0.200075
alendronate	Diabetes Mellitus, Type 2	2	0.200005
alendronate	Hypercholesterolemia	3	0.199981
alendronate	Hepatic Encephalopathy	4	0.199113
alendronate	Hypercalcemia	5	0.196751
alendronate	Glaucoma, Open-Angle	6	0.196698
alendronate	Nutritional and Metabolic Diseases	7	0.196522
alendronate	Psoriasis	8	0.195963
alendronate	Hypoglycemia	9	0.194947
alendronate	Tinea Pedis	10	0.189778
alendronate	Malaria, Falciparum	11	0.183651
alendronate	Osteoarthritis	12	0.17542
alendronate	Obesity	13	0.171925
alendronate	Diabetic Nephropathies	14	0.169816
alendronate	Hyperlipoproteinemia Type II	15	0.164449
alendronate	Neutropenia	16	0.163732
alendronate	Urinary Tract Infections	17	0.16368
alendronate	Adenovirus Infections, Human	18	0.160099
alendronate	Giardiasis	19	0.153396
alendronate	Breast Neoplasms	20	0.140889
alendronate	Asthma	21	0.136643
alendronate	Amyloidosis	22	0.136392
alendronate	Cryptosporidiosis	23	0.1223
alendronate	Hypertension	24	0.117705
alendronate	Hypokalemia	25	0.0849108
alendronate	Cushing Syndrome	26	0.0846074
alendronate	Adrenal Hyperplasia, Congenital	27	0.0834727
alendronate	Thrombocytopenia	28	0.0780007
alendronate	Glaucoma	29	0.077223
alendronate	Acne Vulgaris	30	0.0765537
alitretinoin	Acne Vulgaris	1	0.994999
alitretinoin	Psoriasis	2	0.747228
alitretinoin	Diabetes Mellitus, Type 2	3	0.200398
alitretinoin	Breast Neoplasms	4	0.199846
alitretinoin	Paget Disease, Extramammary	5	0.197409
alitretinoin	Asthma	6	0.197199
alitretinoin	Cushing Syndrome	7	0.195568
alitretinoin	Glaucoma, Open-Angle	8	0.195026
alitretinoin	Adrenal Cortex Neoplasms	9	0.191905
alitretinoin	Puberty, Precocious	10	0.186016
alitretinoin	Gout	11	0.17972
alitretinoin	Hypercholesterolemia	12	0.177904
alitretinoin	Malaria, Falciparum	13	0.177775
alitretinoin	Skin Diseases	14	0.177306
alitretinoin	Alopecia	15	0.1695
alitretinoin	Prostatic Hyperplasia	16	0.162004
alitretinoin	Osteoporosis, Postmenopausal	17	0.154831
alitretinoin	Iridocyclitis	18	0.154585
alitretinoin	Uterine Neoplasms	19	0.147367
alitretinoin	Schizophrenia	20	0.145144
alitretinoin	Graft vs Host Disease	21	0.134758
alitretinoin	Prostatic Neoplasms	22	0.130486
alitretinoin	Respiratory Tract Diseases	23	0.126836
alitretinoin	Tinea Pedis	24	0.125756
alitretinoin	Diabetic Nephropathies	25	0.121943
alitretinoin	Alcoholism	26	0.112441
alitretinoin	Hyperaldosteronism	27	0.112324
alitretinoin	Hypertension	28	0.111092
alitretinoin	Obesity	29	0.110933
alitretinoin	Pheochromocytoma	30	0.106055
allopurinol	Malaria, Falciparum	1	0.200789
allopurinol	Diabetes Mellitus, Type 2	2	0.199989
allopurinol	Tinea Pedis	3	0.199948
allopurinol	Giardiasis	4	0.199939
allopurinol	Cryptosporidiosis	5	0.199898
allopurinol	Adenovirus Infections, Human	6	0.199862
allopurinol	Paget Disease, Extramammary	7	0.199636
allopurinol	Amebiasis	8	0.199528
allopurinol	Breast Neoplasms	9	0.199451
allopurinol	Rosacea	10	0.1994
allopurinol	Psoriasis	11	0.199323
allopurinol	Glaucoma, Open-Angle	12	0.199159
allopurinol	Toxoplasmosis	13	0.198952
allopurinol	Glaucoma	14	0.198371
allopurinol	Hypercholesterolemia	15	0.197573
allopurinol	Dermatitis Herpetiformis	16	0.196158
allopurinol	Adenomatous Polyposis Coli	17	0.194404
allopurinol	Esophageal Neoplasms	18	0.194186
allopurinol	Glioblastoma	19	0.194181
allopurinol	Multiple Myeloma	20	0.193301
allopurinol	Keratitis	21	0.19317
allopurinol	Leukemia, Hairy Cell	22	0.192793
allopurinol	Colorectal Neoplasms	23	0.192746
allopurinol	Lymphoma, T-Cell, Cutaneous	24	0.19142
allopurinol	Adrenal Cortex Neoplasms	25	0.19081
allopurinol	Lymphoma, Non-Hodgkin	26	0.190281
allopurinol	Fibrocystic Breast Disease	27	0.19009
allopurinol	Virus Diseases	28	0.187529
allopurinol	Fibrosarcoma	29	0.186707
allopurinol	Gynecomastia	30	0.186244
alprostadil	Aortic Coarctation	1	0.999843
alprostadil	Pulmonary Valve Stenosis	2	0.963281
alprostadil	Wolff-Parkinson-White Syndrome	3	0.783013
alprostadil	Rhinitis, Allergic, Perennial	4	0.673721
alprostadil	Urticaria	5	0.493845
alprostadil	Heart Arrest	6	0.343711
alprostadil	Asthma	7	0.341116
alprostadil	Tachycardia, Supraventricular	8	0.308304
alprostadil	Ventricular Dysfunction	9	0.291178
alprostadil	Ventricular Fibrillation	10	0.283821
alprostadil	Heart Failure	11	0.277703
alprostadil	Aortic Arch Syndromes	12	0.266005
alprostadil	Abnormalities, Drug-Induced	13	0.265861
alprostadil	Peptic Ulcer	14	0.240101
alprostadil	Rhinitis, Vasomotor	15	0.23533
alprostadil	Endocarditis	16	0.232392
alprostadil	Bronchial Spasm	17	0.224801
alprostadil	Puberty, Precocious	18	0.222265
alprostadil	Myocardial Infarction	19	0.213026
alprostadil	Erectile Dysfunction	20	0.212278
alprostadil	Pain	21	0.212045
alprostadil	Cardiac Output, Low	22	0.209136
alprostadil	Respiratory Tract Diseases	23	0.206784
alprostadil	Angina Pectoris	24	0.205998
alprostadil	Coronary Disease	25	0.204604
alprostadil	Pulmonary Emphysema	26	0.204148
alprostadil	Glaucoma, Open-Angle	27	0.203601
alprostadil	Toxoplasmosis	28	0.203445
alprostadil	Malaria, Falciparum	29	0.201946
alprostadil	Bradycardia	30	0.201849
amantadine	Schizophrenia	1	0.999985
amantadine	Pain	2	0.99997
amantadine	Psychotic Disorders	3	0.999948
amantadine	Anxiety Disorders	4	0.774047
amantadine	Vomiting	5	0.443912
amantadine	Tourette Syndrome	6	0.394273
amantadine	Nausea	7	0.328106
amantadine	Sleep Initiation and Maintenance Disorders	8	0.309929
amantadine	Dementia	9	0.307954
amantadine	Parkinsonian Disorders	10	0.302544
amantadine	Bipolar Disorder	11	0.271702
amantadine	Essential Tremor	12	0.254531
amantadine	Tremor	13	0.236024
amantadine	Dyskinesias	14	0.233964
amantadine	Psychomotor Agitation	15	0.229675
amantadine	Huntington Disease	16	0.227924
amantadine	Torticollis	17	0.223978
amantadine	Alzheimer Disease	18	0.221639
amantadine	Psychophysiologic Disorders	19	0.205597
amantadine	Neuroleptic Malignant Syndrome	20	0.204425
amantadine	Mental Retardation	21	0.203979
amantadine	Asthma	22	0.203893
amantadine	Seizures	23	0.203579
amantadine	Alcoholism	24	0.202667
amantadine	Angina Pectoris	25	0.20059
amantadine	Restless Legs Syndrome	26	0.200413
amantadine	Depressive Disorder	27	0.200199
amantadine	Hypertension	28	0.20001
amantadine	Panic Disorder	29	0.199555
amantadine	Opioid-Related Disorders	30	0.196782
amcinonide	Skin Diseases	1	0.987081
amcinonide	Skin Diseases, Eczematous	2	0.950244
amcinonide	Rosacea	3	0.604616
amcinonide	Pruritus	4	0.382224
amcinonide	Acne Vulgaris	5	0.316889
amcinonide	Rheumatic Diseases	6	0.270605
amcinonide	Photosensitivity Disorders	7	0.25798
amcinonide	Psoriasis	8	0.255347
amcinonide	Adrenal Insufficiency	9	0.213554
amcinonide	Tinea Pedis	10	0.200056
amcinonide	Gout	11	0.197154
amcinonide	Osteoarthritis	12	0.196276
amcinonide	Diabetes Mellitus, Type 2	13	0.195451
amcinonide	Hematologic Diseases	14	0.194617
amcinonide	Collagen Diseases	15	0.190194
amcinonide	Hyperhidrosis	16	0.190046
amcinonide	Dermatitis, Seborrheic	17	0.187917
amcinonide	Skin Diseases, Infectious	18	0.185478
amcinonide	Candidiasis, Cutaneous	19	0.167555
amcinonide	Asthma	20	0.144926
amcinonide	Keratosis	21	0.125741
amcinonide	Mastocytosis	22	0.122002
amcinonide	Scleroderma, Systemic	23	0.111546
amcinonide	Arthritis, Rheumatoid	24	0.0893222
amcinonide	Hypertension	25	0.0636385
amcinonide	Arthritis, Juvenile Rheumatoid	26	0.052681
amcinonide	Pruritus Ani	27	0.0525594
amcinonide	Lupus Erythematosus, Systemic	28	0.0492802
amcinonide	Urinary Tract Infections	29	0.047117
amcinonide	Lupus Erythematosus, Discoid	30	0.029606
amifostine	Respiratory Syncytial Virus Infections	1	0.21241
amifostine	Adenovirus Infections, Human	2	0.209726
amifostine	Toxoplasmosis	3	0.202371
amifostine	Malaria, Falciparum	4	0.202035
amifostine	Gout	5	0.20016
amifostine	Hepatic Encephalopathy	6	0.200038
amifostine	Diabetes Mellitus, Type 2	7	0.200004
amifostine	Osteoporosis, Postmenopausal	8	0.199693
amifostine	Giardiasis	9	0.19968
amifostine	Glaucoma, Open-Angle	10	0.199674
amifostine	Hypertension, Malignant	11	0.199591
amifostine	Hypercholesterolemia	12	0.19956
amifostine	Cryptosporidiosis	13	0.199403
amifostine	Hypoglycemia	14	0.199393
amifostine	Nutritional and Metabolic Diseases	15	0.199362
amifostine	Hyperlipoproteinemia Type II	16	0.199244
amifostine	Esophageal and Gastric Varices	17	0.198948
amifostine	Thrombocytopenia	18	0.198859
amifostine	Obesity	19	0.198856
amifostine	Diabetic Nephropathies	20	0.198816
amifostine	Hypertension	21	0.198022
amifostine	Drug Toxicity	22	0.197814
amifostine	Amyloidosis	23	0.197534
amifostine	Coronary Disease	24	0.197088
amifostine	Amebiasis	25	0.195895
amifostine	Angina Pectoris	26	0.195612
amifostine	Magnesium Deficiency	27	0.195134
amifostine	Glaucoma	28	0.195081
amifostine	Paget Disease, Extramammary	29	0.194932
amifostine	Cystinosis	30	0.194702
amikacin	Staphylococcal Infections	1	0.984678
amikacin	Eye Infections, Bacterial	2	0.917164
amikacin	Gram-Negative Bacterial Infections	3	0.9003
amikacin	Skin Diseases, Bacterial	4	0.899657
amikacin	Urinary Tract Infections	5	0.690542
amikacin	Endocarditis, Bacterial	6	0.527036
amikacin	Brucellosis	7	0.372463
amikacin	Septicemia	8	0.325356
amikacin	Tularemia	9	0.319818
amikacin	Escherichia coli Infections	10	0.291769
amikacin	Hepatic Encephalopathy	11	0.279796
amikacin	Plague	12	0.233147
amikacin	Gram-Positive Bacterial Infections	13	0.203486
amikacin	Actinomycetales Infections	14	0.202616
amikacin	Soft Tissue Infections	15	0.201103
amikacin	Bacterial Infections	16	0.200428
amikacin	Nocardia Infections	17	0.200364
amikacin	Streptococcal Infections	18	0.200256
amikacin	Bronchitis	19	0.200167
amikacin	Endocarditis, Subacute Bacterial	20	0.200105
amikacin	Proteus Infections	21	0.20009
amikacin	Pharyngitis	22	0.200046
amikacin	Enterobacteriaceae Infections	23	0.200036
amikacin	Listeriosis	24	0.200011
amikacin	Clostridium Infections	25	0.199992
amikacin	Anthrax	26	0.199992
amikacin	Tuberculosis	27	0.199991
amikacin	Staphylococcal Skin Infections	28	0.199984
amikacin	Typhoid Fever	29	0.199975
amikacin	Candidiasis, Vulvovaginal	30	0.199962
amiloride	Hypokalemia	1	0.801708
amiloride	Hypertension, Malignant	2	0.206871
amiloride	Cyanosis	3	0.203062
amiloride	Fatigue	4	0.201736
amiloride	Cough	5	0.201553
amiloride	Constipation	6	0.200443
amiloride	Nephrotic Syndrome	7	0.200441
amiloride	Bartter Syndrome	8	0.20023
amiloride	Cushing Syndrome	9	0.200218
amiloride	Urinary Retention	10	0.200086
amiloride	Liver Cirrhosis	11	0.200082
amiloride	Angina Pectoris	12	0.200063
amiloride	Alopecia	13	0.200042
amiloride	Heart Failure	14	0.200036
amiloride	Diabetic Nephropathies	15	0.200015
amiloride	Pain	16	0.20001
amiloride	Asthma	17	0.199997
amiloride	Diabetes Mellitus, Type 2	18	0.199978
amiloride	Apnea	19	0.199946
amiloride	Rhinitis, Allergic, Perennial	20	0.199694
amiloride	Hyperaldosteronism	21	0.199611
amiloride	Tinea Pedis	22	0.199606
amiloride	Giardiasis	23	0.199434
amiloride	Prostatic Hyperplasia	24	0.199238
amiloride	Purpura	25	0.199006
amiloride	Osteoarthritis	26	0.198828
amiloride	Zollinger-Ellison Syndrome	27	0.198784
amiloride	Hirsutism	28	0.198756
amiloride	Urticaria	29	0.19853
amiloride	Endometriosis	30	0.198428
aminoglutethimide	Candidiasis, Vulvovaginal	1	0.286437
aminoglutethimide	Tinea Pedis	2	0.200725
aminoglutethimide	Diabetes Mellitus, Type 2	3	0.199998
aminoglutethimide	Hypertension, Malignant	4	0.199985
aminoglutethimide	Malaria, Falciparum	5	0.199889
aminoglutethimide	Adrenal Cortex Neoplasms	6	0.199742
aminoglutethimide	Diabetic Nephropathies	7	0.199718
aminoglutethimide	Hypertension	8	0.199556
aminoglutethimide	Thyroid Neoplasms	9	0.198165
aminoglutethimide	Prostatic Hyperplasia	10	0.197992
aminoglutethimide	Tinea Versicolor	11	0.196526
aminoglutethimide	Puberty, Precocious	12	0.194909
aminoglutethimide	Uterine Neoplasms	13	0.187101
aminoglutethimide	Hypercholesterolemia	14	0.185962
aminoglutethimide	Hyperaldosteronism	15	0.181808
aminoglutethimide	Pregnancy, Ectopic	16	0.168614
aminoglutethimide	Bartter Syndrome	17	0.162245
aminoglutethimide	Prostatic Neoplasms	18	0.129519
aminoglutethimide	Glioblastoma	19	0.124269
aminoglutethimide	Puberty, Delayed	20	0.122597
aminoglutethimide	Medulloblastoma	21	0.119086
aminoglutethimide	Thyrotoxicosis	22	0.111818
aminoglutethimide	Coronary Artery Disease	23	0.0911524
aminoglutethimide	Ependymoma	24	0.0854464
aminoglutethimide	Hyperparathyroidism	25	0.0840306
aminoglutethimide	Gout	26	0.0830451
aminoglutethimide	Urinary Bladder Neoplasms	27	0.0826183
aminoglutethimide	Menopause, Premature	28	0.0822184
aminoglutethimide	Trichomonas Vaginitis	29	0.0813626
aminoglutethimide	Heart Failure	30	0.0811984
aminophylline	Tachycardia, Supraventricular	1	0.207292
aminophylline	Rhinitis, Vasomotor	2	0.204222
aminophylline	Heart Block	3	0.201926
aminophylline	Heart Failure	4	0.201528
aminophylline	Respiratory Tract Diseases	5	0.201465
aminophylline	Pain	6	0.201306
aminophylline	Ventricular Fibrillation	7	0.2011
aminophylline	Rhinitis, Allergic, Perennial	8	0.200826
aminophylline	Arrhythmias, Cardiac	9	0.200714
aminophylline	Cardiac Output, Low	10	0.200564
aminophylline	Cough	11	0.200399
aminophylline	Angina Pectoris	12	0.200155
aminophylline	Hypertension	13	0.200076
aminophylline	Heart Arrest	14	0.200054
aminophylline	Purpura	15	0.200013
aminophylline	Hemorrhage	16	0.199996
aminophylline	Myocardial Infarction	17	0.199931
aminophylline	Ascites	18	0.199913
aminophylline	Angina Pectoris, Variant	19	0.199908
aminophylline	Ventricular Dysfunction, Left	20	0.199907
aminophylline	Ulcer	21	0.199869
aminophylline	Glaucoma, Open-Angle	22	0.199821
aminophylline	Shock	23	0.199753
aminophylline	Urticaria	24	0.199742
aminophylline	Growth Disorders	25	0.199739
aminophylline	Hemorrhoids	26	0.199735
aminophylline	Intraoperative Complications	27	0.199729
aminophylline	Necrosis	28	0.199708
aminophylline	Edema	29	0.199672
aminophylline	Constipation	30	0.199671
aminosalicylic acid	Toxoplasmosis	1	0.203766
aminosalicylic acid	Nocardia Infections	2	0.201132
aminosalicylic acid	Bronchitis	3	0.201034
aminosalicylic acid	Malaria, Falciparum	4	0.200986
aminosalicylic acid	Urinary Tract Infections	5	0.200629
aminosalicylic acid	Diverticulitis	6	0.200129
aminosalicylic acid	Conjunctivitis, Bacterial	7	0.200089
aminosalicylic acid	Inflammatory Bowel Diseases	8	0.200048
aminosalicylic acid	Enterocolitis, Pseudomembranous	9	0.200046
aminosalicylic acid	Giardiasis	10	0.200041
aminosalicylic acid	Rhinitis, Vasomotor	11	0.200034
aminosalicylic acid	Escherichia coli Infections	12	0.200028
aminosalicylic acid	Keratoconjunctivitis, Infectious	13	0.200024
aminosalicylic acid	Cryptosporidiosis	14	0.200012
aminosalicylic acid	Tuberculosis, Pulmonary	15	0.200012
aminosalicylic acid	Gout	16	0.200009
aminosalicylic acid	Osteoporosis, Postmenopausal	17	0.200008
aminosalicylic acid	Colitis, Ulcerative	18	0.200007
aminosalicylic acid	Tinea Pedis	19	0.200002
aminosalicylic acid	Hypertension	20	0.2
aminosalicylic acid	Diabetes Mellitus, Type 2	21	0.199999
aminosalicylic acid	Osteoarthritis	22	0.199987
aminosalicylic acid	Rhinitis	23	0.199985
aminosalicylic acid	Thromboembolism	24	0.199985
aminosalicylic acid	Tetanus	25	0.199973
aminosalicylic acid	Staphylococcal Skin Infections	26	0.199968
aminosalicylic acid	Endocarditis	27	0.199962
aminosalicylic acid	Ventricular Dysfunction, Left	28	0.199956
aminosalicylic acid	Tinea Versicolor	29	0.19995
aminosalicylic acid	Hypercholesterolemia	30	0.199914
amiodarone	Hypertension	1	0.999976
amiodarone	Atrial Fibrillation	2	0.996189
amiodarone	Atrial Flutter	3	0.985892
amiodarone	Myocardial Infarction	4	0.852392
amiodarone	Tachycardia, Ventricular	5	0.809557
amiodarone	Angina Pectoris	6	0.263797
amiodarone	Pain	7	0.217744
amiodarone	Angina Pectoris, Variant	8	0.201031
amiodarone	Asthma	9	0.200056
amiodarone	Schizophrenia	10	0.199994
amiodarone	Bronchial Spasm	11	0.19979
amiodarone	Parkinson Disease	12	0.199758
amiodarone	Inflammation	13	0.199694
amiodarone	Nausea	14	0.199369
amiodarone	Abnormalities, Drug-Induced	15	0.198825
amiodarone	Cardiac Output, Low	16	0.198751
amiodarone	Ventricular Dysfunction, Left	17	0.198636
amiodarone	Hypotension, Orthostatic	18	0.198488
amiodarone	Heart Arrest	19	0.198356
amiodarone	Bipolar Disorder	20	0.19761
amiodarone	Rhinitis, Vasomotor	21	0.197427
amiodarone	Vomiting	22	0.194826
amiodarone	Urinary Retention	23	0.190732
amiodarone	Alzheimer Disease	24	0.188894
amiodarone	Angina, Unstable	25	0.180678
amiodarone	Alcoholism	26	0.17803
amiodarone	Thromboembolism	27	0.173079
amiodarone	Heart Failure	28	0.164279
amiodarone	Pruritus	29	0.140074
amiodarone	Hypertension, Malignant	30	0.138673
amitriptyline	Panic Disorder	1	0.64316
amitriptyline	Schizophrenia	2	0.348052
amitriptyline	Attention Deficit Disorder with Hyperactivity	3	0.273846
amitriptyline	Obsessive-Compulsive Disorder	4	0.231617
amitriptyline	Bipolar Disorder	5	0.214441
amitriptyline	Parkinson Disease	6	0.2092
amitriptyline	Anxiety Disorders	7	0.20428
amitriptyline	Psychotic Disorders	8	0.201718
amitriptyline	Sleep Initiation and Maintenance Disorders	9	0.200743
amitriptyline	Alcoholism	10	0.200517
amitriptyline	Alzheimer Disease	11	0.200239
amitriptyline	Dementia	12	0.200112
amitriptyline	Opioid-Related Disorders	13	0.200062
amitriptyline	Tourette Syndrome	14	0.200024
amitriptyline	Asthma	15	0.200019
amitriptyline	Substance-Related Disorders	16	0.199741
amitriptyline	Tobacco Use Disorder	17	0.199671
amitriptyline	Stress Disorders, Post-Traumatic	18	0.199138
amitriptyline	Hypertension	19	0.198357
amitriptyline	Pruritus	20	0.198253
amitriptyline	Nausea	21	0.198163
amitriptyline	Phobic Disorders	22	0.198064
amitriptyline	Autistic Disorder	23	0.197323
amitriptyline	Cocaine-Related Disorders	24	0.196954
amitriptyline	Eating Disorders	25	0.196471
amitriptyline	Vomiting	26	0.196207
amitriptyline	Narcolepsy	27	0.192512
amitriptyline	Seizures	28	0.176953
amitriptyline	Psychomotor Agitation	29	0.172932
amitriptyline	Delirium	30	0.167918
amlexanox	Postoperative Complications	1	0.200021
amlexanox	Rhinitis, Vasomotor	2	0.200004
amlexanox	Hypertension	3	0.199981
amlexanox	Malaria, Falciparum	4	0.199941
amlexanox	Tinea Pedis	5	0.199931
amlexanox	Angina Pectoris	6	0.199843
amlexanox	Thromboembolism	7	0.199671
amlexanox	Gout	8	0.199669
amlexanox	Diabetes Mellitus, Type 2	9	0.199634
amlexanox	Malignant Hyperthermia	10	0.199106
amlexanox	Growth Disorders	11	0.198782
amlexanox	Hemorrhage	12	0.198563
amlexanox	Multiple Myeloma	13	0.198232
amlexanox	Ventricular Dysfunction, Left	14	0.197124
amlexanox	Tinea Versicolor	15	0.196742
amlexanox	Prostatic Hyperplasia	16	0.196623
amlexanox	Hypertension, Malignant	17	0.19629
amlexanox	Angina Pectoris, Variant	18	0.194912
amlexanox	Osteoarthritis	19	0.194223
amlexanox	Urinary Tract Infections	20	0.193919
amlexanox	Psoriasis	21	0.191132
amlexanox	Cryptosporidiosis	22	0.189089
amlexanox	Menstruation Disturbances	23	0.188592
amlexanox	Asthma	24	0.187825
amlexanox	Hyperbilirubinemia	25	0.187808
amlexanox	Coronary Disease	26	0.187804
amlexanox	Pain	27	0.187369
amlexanox	Myocardial Infarction	28	0.186464
amlexanox	Graft Occlusion, Vascular	29	0.184692
amlexanox	Skin Diseases, Infectious	30	0.183363
amlodipine	Angina Pectoris, Variant	1	0.875685
amlodipine	Asthma	2	0.199459
amlodipine	Schizophrenia	3	0.194905
amlodipine	Angina Pectoris	4	0.185423
amlodipine	Hypertension, Malignant	5	0.180242
amlodipine	Pain	6	0.173201
amlodipine	Parkinson Disease	7	0.159257
amlodipine	Ventricular Dysfunction, Left	8	0.141054
amlodipine	Myocardial Infarction	9	0.0761999
amlodipine	Diabetes Mellitus, Type 2	10	0.07384
amlodipine	Diabetic Nephropathies	11	0.0671576
amlodipine	Bipolar Disorder	12	0.0633411
amlodipine	Prostatic Hyperplasia	13	0.0276303
amlodipine	Heart Failure	14	0.021822
amlodipine	Tachycardia, Supraventricular	15	0.0199336
amlodipine	Inflammation	16	0.0196989
amlodipine	Atrial Flutter	17	0.0177938
amlodipine	Urinary Retention	18	0.0174475
amlodipine	Atrial Fibrillation	19	0.0164565
amlodipine	Hepatic Encephalopathy	20	0.0104478
amlodipine	Epilepsies, Partial	21	0.00903043
amlodipine	Alcoholism	22	0.00817936
amlodipine	Rhinitis, Vasomotor	23	0.00566606
amlodipine	Abnormalities, Drug-Induced	24	0.0045989
amlodipine	Angina, Unstable	25	0.00413557
amlodipine	Hypotension, Orthostatic	26	0.0038936
amlodipine	Alzheimer Disease	27	0.00337123
amlodipine	Nephrotic Syndrome	28	0.00299627
amlodipine	Pain, Postoperative	29	0.00261893
amlodipine	Seizures	30	0.00248069
amoxapine	Pain	1	1
amoxapine	Schizophrenia	2	0.999999
amoxapine	Psychotic Disorders	3	0.999999
amoxapine	Depressive Disorder	4	0.999986
amoxapine	Parkinson Disease	5	0.888168
amoxapine	Bipolar Disorder	6	0.732816
amoxapine	Anxiety Disorders	7	0.550085
amoxapine	Panic Disorder	8	0.519476
amoxapine	Attention Deficit Disorder with Hyperactivity	9	0.418357
amoxapine	Obsessive-Compulsive Disorder	10	0.316008
amoxapine	Sleep Initiation and Maintenance Disorders	11	0.227898
amoxapine	Autistic Disorder	12	0.216867
amoxapine	Tourette Syndrome	13	0.205854
amoxapine	Dementia	14	0.204082
amoxapine	Vomiting	15	0.203864
amoxapine	Asthma	16	0.20076
amoxapine	Nausea	17	0.2005
amoxapine	Hypertension	18	0.200428
amoxapine	Tachycardia, Supraventricular	19	0.200385
amoxapine	Psychomotor Agitation	20	0.200309
amoxapine	Alzheimer Disease	21	0.200294
amoxapine	Alcoholism	22	0.200203
amoxapine	Pruritus	23	0.200083
amoxapine	Angina Pectoris	24	0.200047
amoxapine	Opioid-Related Disorders	25	0.200045
amoxapine	Pain, Postoperative	26	0.200019
amoxapine	Enuresis	27	0.200011
amoxapine	Cough	28	0.199998
amoxapine	Mental Retardation	29	0.199983
amoxapine	Delirium	30	0.199922
amoxicillin	Pneumonia, Bacterial	1	1
amoxicillin	Staphylococcal Infections	2	1
amoxicillin	Escherichia coli Infections	3	1
amoxicillin	Haemophilus Infections	4	0.999994
amoxicillin	Proteus Infections	5	0.999855
amoxicillin	Klebsiella Infections	6	0.999854
amoxicillin	Staphylococcal Skin Infections	7	0.999306
amoxicillin	Wound Infection	8	0.998518
amoxicillin	Respiratory Tract Infections	9	0.997785
amoxicillin	Gonorrhea	10	0.997408
amoxicillin	Endocarditis, Bacterial	11	0.997045
amoxicillin	Osteomyelitis	12	0.994465
amoxicillin	Bone Diseases, Infectious	13	0.994009
amoxicillin	Cellulitis	14	0.986171
amoxicillin	Pharyngitis	15	0.980013
amoxicillin	Bronchitis	16	0.961706
amoxicillin	Postoperative Complications	17	0.960124
amoxicillin	Impetigo	18	0.921436
amoxicillin	Septicemia	19	0.915394
amoxicillin	Gram-Positive Bacterial Infections	20	0.898005
amoxicillin	Meningitis, Bacterial	21	0.882533
amoxicillin	Bacterial Infections	22	0.781876
amoxicillin	Gram-Negative Bacterial Infections	23	0.760586
amoxicillin	Pseudomonas Infections	24	0.640825
amoxicillin	Salmonella Infections	25	0.456638
amoxicillin	Chlamydiaceae Infections	26	0.437015
amoxicillin	Enterobacteriaceae Infections	27	0.413853
amoxicillin	Bites, Human	28	0.372161
amoxicillin	Actinomycosis	29	0.347032
amoxicillin	Pneumococcal Infections	30	0.327142
ampicillin	Staphylococcal Infections	1	1
ampicillin	Pneumonia, Bacterial	2	1
ampicillin	Urinary Tract Infections	3	1
ampicillin	Wound Infection	4	1
ampicillin	Proteus Infections	5	0.999997
ampicillin	Staphylococcal Skin Infections	6	0.999984
ampicillin	Streptococcal Infections	7	0.999967
ampicillin	Osteomyelitis	8	0.999963
ampicillin	Postoperative Complications	9	0.999889
ampicillin	Bacterial Infections	10	0.999704
ampicillin	Gram-Negative Bacterial Infections	11	0.99947
ampicillin	Bone Diseases, Infectious	12	0.999198
ampicillin	Septicemia	13	0.998794
ampicillin	Enterobacteriaceae Infections	14	0.998722
ampicillin	Gram-Positive Bacterial Infections	15	0.977415
ampicillin	Cellulitis	16	0.969991
ampicillin	Impetigo	17	0.886031
ampicillin	Serratia Infections	18	0.867505
ampicillin	Neisseriaceae Infections	19	0.865283
ampicillin	Pharyngitis	20	0.852146
ampicillin	Pseudomonas Infections	21	0.834457
ampicillin	Surgical Wound Infection	22	0.811414
ampicillin	Bronchitis	23	0.809612
ampicillin	Skin Diseases, Infectious	24	0.749034
ampicillin	Otitis Media	25	0.641358
ampicillin	Chlamydiaceae Infections	26	0.6286
ampicillin	Spirochaetales Infections	27	0.320357
ampicillin	Sepsis	28	0.311912
ampicillin	Chancroid	29	0.300498
ampicillin	Brucellosis	30	0.298911
amprenavir	Acquired Immunodeficiency Syndrome	1	0.998212
amprenavir	Urinary Tract Infections	2	0.19992
amprenavir	Hypertension	3	0.194428
amprenavir	Escherichia coli Infections	4	0.146449
amprenavir	Diabetic Nephropathies	5	0.144232
amprenavir	Tinea Pedis	6	0.0648704
amprenavir	Diabetes Mellitus, Type 2	7	0.0583837
amprenavir	Heart Failure	8	0.0234595
amprenavir	Ventricular Dysfunction, Left	9	0.0120888
amprenavir	Gram-Positive Bacterial Infections	10	0.00776291
amprenavir	Staphylococcal Infections	11	0.00386512
amprenavir	Hypertension, Malignant	12	0.00301855
amprenavir	Skin Diseases, Bacterial	13	0.0014284
amprenavir	Hypercholesterolemia	14	0.00119995
amprenavir	Rhinitis, Vasomotor	15	0.00070269
amprenavir	Abnormalities, Drug-Induced	16	0.000303719
amprenavir	Tinea Versicolor	17	0.00027055
amprenavir	Candidiasis, Vulvovaginal	18	0.000261871
amprenavir	Skin Diseases, Infectious	19	0.000260326
amprenavir	Thromboembolism	20	0.000183215
amprenavir	Giardiasis	21	0.000164253
amprenavir	Toxoplasmosis	22	0.000141894
amprenavir	Malaria, Falciparum	23	0.000136959
amprenavir	Gout	24	0.000135393
amprenavir	Gonorrhea	25	0.000121966
amprenavir	Parkinson Disease, Postencephalitic	26	0.000119586
amprenavir	Osteoarthritis	27	0.000105264
amprenavir	Soft Tissue Infections	28	8.44996e-05
amprenavir	Bronchitis	29	7.18281e-05
amprenavir	Respiratory Tract Infections	30	6.01344e-05
anagrelide	Malaria, Falciparum	1	0.200372
anagrelide	Heart Failure	2	0.20035
anagrelide	Thromboembolism	3	0.200028
anagrelide	Coronary Disease	4	0.200009
anagrelide	Hypertension	5	0.200004
anagrelide	Angina Pectoris	6	0.200004
anagrelide	Hypertension, Malignant	7	0.200001
anagrelide	Myocardial Infarction	8	0.19999
anagrelide	Endocarditis	9	0.199984
anagrelide	Diabetic Nephropathies	10	0.19998
anagrelide	Ventricular Dysfunction, Left	11	0.199979
anagrelide	Aortic Aneurysm	12	0.199974
anagrelide	Subarachnoid Hemorrhage	13	0.199958
anagrelide	Gangrene	14	0.199942
anagrelide	Growth Disorders	15	0.199933
anagrelide	Raynaud Disease	16	0.199924
anagrelide	Hemorrhage	17	0.199908
anagrelide	Cardiomyopathy, Dilated	18	0.199848
anagrelide	Ventricular Fibrillation	19	0.199808
anagrelide	Gout	20	0.199779
anagrelide	Ventricular Premature Complexes	21	0.19969
anagrelide	Diabetes Mellitus, Type 2	22	0.199658
anagrelide	Angina Pectoris, Variant	23	0.199629
anagrelide	Angina, Unstable	24	0.199619
anagrelide	Postoperative Complications	25	0.199591
anagrelide	Ascites	26	0.199559
anagrelide	Heart Arrest	27	0.199402
anagrelide	Obesity	28	0.199402
anagrelide	Necrosis	29	0.199328
anagrelide	Pulmonary Valve Stenosis	30	0.199308
anastrozole	Candidiasis, Vulvovaginal	1	0.731258
anastrozole	Tinea Pedis	2	0.210451
anastrozole	Cushing Syndrome	3	0.206194
anastrozole	Diabetes Mellitus, Type 2	4	0.199915
anastrozole	Tinea Versicolor	5	0.198671
anastrozole	Malaria, Falciparum	6	0.195621
anastrozole	Neoplasms, Hormone-Dependent	7	0.172281
anastrozole	Adrenal Cortex Neoplasms	8	0.11228
anastrozole	Hypertension, Malignant	9	0.108424
anastrozole	Candidiasis, Cutaneous	10	0.0525309
anastrozole	Candidiasis, Oral	11	0.0509871
anastrozole	Skin Diseases, Infectious	12	0.031225
anastrozole	Diabetic Nephropathies	13	0.0211118
anastrozole	Hypertension	14	0.0162111
anastrozole	Hypercholesterolemia	15	0.0115719
anastrozole	Thyroid Neoplasms	16	0.00822768
anastrozole	Urinary Tract Infections	17	0.00628005
anastrozole	Toxoplasmosis	18	0.00478529
anastrozole	Leishmaniasis	19	0.00425916
anastrozole	Coccidioidomycosis	20	0.00400735
anastrozole	Histoplasmosis	21	0.00374073
anastrozole	Giardiasis	22	0.00297893
anastrozole	Herpes Genitalis	23	0.00291251
anastrozole	Tinea Capitis	24	0.00267721
anastrozole	Candidiasis, Chronic Mucocutaneous	25	0.00244241
anastrozole	Amebiasis	26	0.00231252
anastrozole	Blastomycosis	27	0.00201823
anastrozole	Warts	28	0.00165521
anastrozole	Leishmaniasis, Visceral	29	0.00157619
anastrozole	Dermatitis, Seborrheic	30	0.00154392
anisindione	Pulmonary Embolism	1	0.996802
anisindione	Thrombosis	2	0.278192
anisindione	Intracranial Embolism and Thrombosis	3	0.235406
anisindione	Thrombophlebitis	4	0.210951
anisindione	Coronary Disease	5	0.209192
anisindione	Endocarditis	6	0.200088
anisindione	Angina Pectoris	7	0.200029
anisindione	Malaria, Falciparum	8	0.20001
anisindione	Hypertension	9	0.200004
anisindione	Asthma	10	0.199999
anisindione	Atrial Flutter	11	0.199952
anisindione	Rhinitis, Vasomotor	12	0.199859
anisindione	Bronchial Spasm	13	0.199839
anisindione	Abnormalities, Drug-Induced	14	0.199638
anisindione	Rhinitis	15	0.199463
anisindione	Diabetes Mellitus, Type 2	16	0.199443
anisindione	Tetanus	17	0.198881
anisindione	Postoperative Complications	18	0.198725
anisindione	Stroke	19	0.19867
anisindione	Aortic Aneurysm	20	0.19842
anisindione	Raynaud Disease	21	0.197831
anisindione	Ventricular Dysfunction, Left	22	0.197136
anisindione	Hypertension, Malignant	23	0.196917
anisindione	Parkinson Disease	24	0.19612
anisindione	Angina, Unstable	25	0.194678
anisindione	Schizophrenia	26	0.19467
anisindione	Pain	27	0.193519
anisindione	Tachycardia, Supraventricular	28	0.193444
anisindione	Ventricular Fibrillation	29	0.186555
anisindione	Urinary Tract Infections	30	0.184063
apraclonidine	Pain	1	0.999815
apraclonidine	Asthma	2	0.996892
apraclonidine	Hypertension	3	0.962941
apraclonidine	Glaucoma, Open-Angle	4	0.585913
apraclonidine	Tachycardia, Supraventricular	5	0.4078
apraclonidine	Hypertension, Malignant	6	0.336732
apraclonidine	Hypotension, Orthostatic	7	0.305982
apraclonidine	Myocardial Infarction	8	0.279485
apraclonidine	Angina Pectoris	9	0.271719
apraclonidine	Bronchial Spasm	10	0.263307
apraclonidine	Rhinitis, Allergic, Perennial	11	0.229806
apraclonidine	Schizophrenia	12	0.225632
apraclonidine	Heart Failure	13	0.211578
apraclonidine	Rhinitis, Vasomotor	14	0.209308
apraclonidine	Parkinson Disease	15	0.206597
apraclonidine	Glaucoma	16	0.203793
apraclonidine	Prostatic Hyperplasia	17	0.2034
apraclonidine	Bipolar Disorder	18	0.202255
apraclonidine	Rhinitis	19	0.200571
apraclonidine	Malaria, Falciparum	20	0.20021
apraclonidine	Urticaria	21	0.200151
apraclonidine	Urinary Retention	22	0.20014
apraclonidine	Conjunctivitis, Allergic	23	0.200059
apraclonidine	Dermatitis, Atopic	24	0.200012
apraclonidine	Iridocyclitis	25	0.199974
apraclonidine	Abnormalities, Drug-Induced	26	0.199961
apraclonidine	Edema	27	0.199916
apraclonidine	Ventricular Dysfunction, Left	28	0.199901
apraclonidine	Blepharospasm	29	0.199884
apraclonidine	Obesity	30	0.199853
ardeparin	Venous Thrombosis	1	0.662832
ardeparin	Urinary Tract Infections	2	0.199972
ardeparin	Diabetes Mellitus, Type 2	3	0.199891
ardeparin	Escherichia coli Infections	4	0.198803
ardeparin	Coronary Disease	5	0.197813
ardeparin	Malaria, Falciparum	6	0.196229
ardeparin	Bronchitis	7	0.195484
ardeparin	Neutropenia	8	0.19544
ardeparin	Tinea Pedis	9	0.193576
ardeparin	Angina Pectoris	10	0.192645
ardeparin	Gout	11	0.192232
ardeparin	Hepatic Encephalopathy	12	0.192105
ardeparin	Staphylococcal Skin Infections	13	0.190004
ardeparin	Thrombophlebitis	14	0.188882
ardeparin	Rhinitis, Vasomotor	15	0.1884
ardeparin	Endocarditis	16	0.188014
ardeparin	Giardiasis	17	0.183013
ardeparin	Cryptosporidiosis	18	0.177337
ardeparin	Postoperative Complications	19	0.165251
ardeparin	Hypertension	20	0.162785
ardeparin	Esophageal and Gastric Varices	21	0.15945
ardeparin	Thrombocytopenia	22	0.154692
ardeparin	Myocardial Infarction	23	0.153628
ardeparin	Osteoarthritis	24	0.153488
ardeparin	Candidiasis, Vulvovaginal	25	0.138853
ardeparin	Toxoplasmosis	26	0.138144
ardeparin	Pharyngitis	27	0.136245
ardeparin	Gram-Positive Bacterial Infections	28	0.134197
ardeparin	Amebiasis	29	0.119885
ardeparin	Multiple Myeloma	30	0.0984277
arformoterol	Angina Pectoris	1	0.999867
arformoterol	Hypertension	2	0.999529
arformoterol	Tachycardia, Supraventricular	3	0.995324
arformoterol	Myocardial Infarction	4	0.991512
arformoterol	Bronchial Spasm	5	0.966245
arformoterol	Ventricular Fibrillation	6	0.955609
arformoterol	Heart Failure	7	0.901777
arformoterol	Pain	8	0.754084
arformoterol	Glaucoma, Open-Angle	9	0.619374
arformoterol	Tachycardia, Ventricular	10	0.243539
arformoterol	Schizophrenia	11	0.193939
arformoterol	Parkinson Disease	12	0.183615
arformoterol	Nausea	13	0.161047
arformoterol	Ventricular Dysfunction, Left	14	0.153435
arformoterol	Inflammation	15	0.12919
arformoterol	Cardiac Output, Low	16	0.121408
arformoterol	Rhinitis, Vasomotor	17	0.106183
arformoterol	Rhinitis, Allergic, Perennial	18	0.101631
arformoterol	Abnormalities, Drug-Induced	19	0.0744931
arformoterol	Atrial Fibrillation	20	0.0528659
arformoterol	Conjunctivitis, Allergic	21	0.0511309
arformoterol	Urinary Retention	22	0.0504373
arformoterol	Vomiting	23	0.0350482
arformoterol	Atrial Flutter	24	0.0336023
arformoterol	Angina Pectoris, Variant	25	0.0323965
arformoterol	Edema	26	0.0184856
arformoterol	Urticaria	27	0.00953545
arformoterol	Pruritus	28	0.00409648
arformoterol	Hypotension, Orthostatic	29	0.00282498
arformoterol	Hypertension, Malignant	30	0.00232274
argatroban	Urinary Tract Infections	1	0.200012
argatroban	Escherichia coli Infections	2	0.199996
argatroban	Diabetes Mellitus, Type 2	3	0.199965
argatroban	Tinea Pedis	4	0.199931
argatroban	Hypertension	5	0.199795
argatroban	Malaria, Falciparum	6	0.199384
argatroban	Staphylococcal Skin Infections	7	0.199221
argatroban	Gout	8	0.198896
argatroban	Rhinitis, Vasomotor	9	0.198788
argatroban	Tinea Versicolor	10	0.198647
argatroban	Hypertension, Malignant	11	0.198491
argatroban	Coronary Disease	12	0.198184
argatroban	Diabetic Nephropathies	13	0.198125
argatroban	Multiple Myeloma	14	0.198047
argatroban	Endocarditis	15	0.198006
argatroban	Skin Diseases, Infectious	16	0.197961
argatroban	Ventricular Dysfunction, Left	17	0.197943
argatroban	Postoperative Complications	18	0.197546
argatroban	Candidiasis, Vulvovaginal	19	0.196028
argatroban	Gram-Positive Bacterial Infections	20	0.195445
argatroban	Bronchitis	21	0.194346
argatroban	Giardiasis	22	0.19381
argatroban	Neutropenia	23	0.19245
argatroban	Skin Diseases, Bacterial	24	0.189711
argatroban	Soft Tissue Infections	25	0.188822
argatroban	Impetigo	26	0.188439
argatroban	Myocardial Infarction	27	0.187004
argatroban	Hypercholesterolemia	28	0.180554
argatroban	Pharyngitis	29	0.179517
argatroban	Enterocolitis, Pseudomembranous	30	0.179426
aripiprazole	Schizophrenia	1	1
aripiprazole	Psychotic Disorders	2	0.999998
aripiprazole	Pain	3	0.999967
aripiprazole	Parkinson Disease	4	0.991141
aripiprazole	Bipolar Disorder	5	0.984099
aripiprazole	Depressive Disorder	6	0.929455
aripiprazole	Anxiety Disorders	7	0.511458
aripiprazole	Tourette Syndrome	8	0.216497
aripiprazole	Panic Disorder	9	0.201578
aripiprazole	Vomiting	10	0.20144
aripiprazole	Sleep Initiation and Maintenance Disorders	11	0.200548
aripiprazole	Nausea	12	0.200253
aripiprazole	Asthma	13	0.200028
aripiprazole	Alzheimer Disease	14	0.200016
aripiprazole	Alcoholism	15	0.200014
aripiprazole	Hypertension	16	0.200006
aripiprazole	Psychomotor Agitation	17	0.199965
aripiprazole	Opioid-Related Disorders	18	0.199934
aripiprazole	Pruritus	19	0.199562
aripiprazole	Pain, Postoperative	20	0.199223
aripiprazole	Angina Pectoris	21	0.198783
aripiprazole	Dementia	22	0.198121
aripiprazole	Enuresis	23	0.195207
aripiprazole	Psychophysiologic Disorders	24	0.195148
aripiprazole	Tobacco Use Disorder	25	0.194956
aripiprazole	Impotence, Vasculogenic	26	0.193747
aripiprazole	Cough	27	0.193479
aripiprazole	Tremor	28	0.190678
aripiprazole	Seizures	29	0.189527
aripiprazole	Hypotension, Orthostatic	30	0.188151
arsenic trioxide	Leukemia, Myeloid, Acute	1	0.208061
arsenic trioxide	Malaria, Falciparum	2	0.205
arsenic trioxide	Leukemia, Lymphocytic, Chronic, B-Cell	3	0.203033
arsenic trioxide	Leukemia, Myelogenous, Chronic, BCR-ABL Positive	4	0.202234
arsenic trioxide	Gout	5	0.20203
arsenic trioxide	Urinary Tract Infections	6	0.200564
arsenic trioxide	Postoperative Complications	7	0.200412
arsenic trioxide	Cryptosporidiosis	8	0.20029
arsenic trioxide	Hypercholesterolemia	9	0.200221
arsenic trioxide	Hypertension	10	0.200192
arsenic trioxide	Tinea Pedis	11	0.200172
arsenic trioxide	Paget Disease, Extramammary	12	0.200067
arsenic trioxide	Diabetes Mellitus, Type 2	13	0.20005
arsenic trioxide	Hepatic Encephalopathy	14	0.199951
arsenic trioxide	Diabetic Nephropathies	15	0.199869
arsenic trioxide	Asthma	16	0.199584
arsenic trioxide	Glaucoma, Open-Angle	17	0.19945
arsenic trioxide	Breast Neoplasms	18	0.19939
arsenic trioxide	Angina Pectoris	19	0.199379
arsenic trioxide	Melanoma	20	0.198985
arsenic trioxide	Heart Failure	21	0.198883
arsenic trioxide	Parkinson Disease	22	0.198817
arsenic trioxide	Giardiasis	23	0.198658
arsenic trioxide	Thrombocytopenia	24	0.198597
arsenic trioxide	Multiple Myeloma	25	0.19854
arsenic trioxide	Neuroblastoma	26	0.198036
arsenic trioxide	Amebiasis	27	0.197751
arsenic trioxide	Obesity	28	0.197109
arsenic trioxide	Osteoporosis, Postmenopausal	29	0.196926
arsenic trioxide	Rhabdomyosarcoma	30	0.196752
aspirin	Osteoarthritis	1	0.999997
aspirin	Arthritis, Rheumatoid	2	0.998899
aspirin	Arthritis, Juvenile Rheumatoid	3	0.954018
aspirin	Spondylitis, Ankylosing	4	0.917027
aspirin	Dysmenorrhea	5	0.867704
aspirin	Pain, Postoperative	6	0.250578
aspirin	Arthritis	7	0.212825
aspirin	Asthma	8	0.199969
aspirin	Pruritus	9	0.199878
aspirin	Osteoporosis, Postmenopausal	10	0.199285
aspirin	Schizophrenia	11	0.197472
aspirin	Conjunctivitis, Allergic	12	0.190377
aspirin	Rhinitis, Vasomotor	13	0.189736
aspirin	Bursitis	14	0.188108
aspirin	Tinea Pedis	15	0.187801
aspirin	Hypertension	16	0.184876
aspirin	Sleep Initiation and Maintenance Disorders	17	0.18484
aspirin	Angina Pectoris	18	0.181678
aspirin	Parkinson Disease	19	0.160523
aspirin	Alzheimer Disease	20	0.158529
aspirin	Urinary Tract Infections	21	0.153098
aspirin	Bipolar Disorder	22	0.142836
aspirin	Alcoholism	23	0.130519
aspirin	Nausea	24	0.108951
aspirin	Iridocyclitis	25	0.0954943
aspirin	Psoriasis	26	0.0946174
aspirin	Atrial Fibrillation	27	0.0939851
aspirin	Scalp Dermatoses	28	0.0936711
aspirin	Bronchial Spasm	29	0.0929257
aspirin	Photophobia	30	0.0857727
atenolol	Hypertension	1	1
atenolol	Asthma	2	0.999913
atenolol	Pain	3	0.966308
atenolol	Atrial Flutter	4	0.964391
atenolol	Heart Block	5	0.960983
atenolol	Bradycardia	6	0.955573
atenolol	Cardiac Output, Low	7	0.585761
atenolol	Arrhythmias, Cardiac	8	0.268912
atenolol	Bronchial Spasm	9	0.258891
atenolol	Glaucoma, Open-Angle	10	0.23721
atenolol	Nausea	11	0.199662
atenolol	Ventricular Dysfunction, Left	12	0.199354
atenolol	Vomiting	13	0.190926
atenolol	Heart Arrest	14	0.175072
atenolol	Hemorrhoids	15	0.174714
atenolol	Schizophrenia	16	0.170483
atenolol	Ventricular Premature Complexes	17	0.14525
atenolol	Thromboembolism	18	0.131682
atenolol	Sinoatrial Block	19	0.124705
atenolol	Inflammation	20	0.112684
atenolol	Angina Pectoris, Variant	21	0.112366
atenolol	Edema	22	0.106724
atenolol	Coronary Disease	23	0.100594
atenolol	Nephrotic Syndrome	24	0.0547134
atenolol	Bipolar Disorder	25	0.0498007
atenolol	Psychotic Disorders	26	0.0495123
atenolol	Raynaud Disease	27	0.0468427
atenolol	Parkinson Disease	28	0.0448999
atenolol	Peptic Ulcer	29	0.044676
atenolol	Abnormalities, Drug-Induced	30	0.0425357
atomoxetine	Depressive Disorder	1	0.974389
atomoxetine	Panic Disorder	2	0.919088
atomoxetine	Obsessive-Compulsive Disorder	3	0.880315
atomoxetine	Pain	4	0.721234
atomoxetine	Asthma	5	0.199948
atomoxetine	Alzheimer Disease	6	0.199737
atomoxetine	Schizophrenia	7	0.199352
atomoxetine	Alcoholism	8	0.199176
atomoxetine	Parkinson Disease	9	0.197611
atomoxetine	Angina Pectoris	10	0.182979
atomoxetine	Bipolar Disorder	11	0.181438
atomoxetine	Rhinitis, Vasomotor	12	0.179741
atomoxetine	Hypertension	13	0.179325
atomoxetine	Bronchial Spasm	14	0.168852
atomoxetine	Atrial Fibrillation	15	0.162212
atomoxetine	Diabetes Mellitus, Type 2	16	0.155689
atomoxetine	Opioid-Related Disorders	17	0.128221
atomoxetine	Stress Disorders, Post-Traumatic	18	0.126854
atomoxetine	Tourette Syndrome	19	0.10057
atomoxetine	Phobic Disorders	20	0.0838806
atomoxetine	Atrial Flutter	21	0.0650842
atomoxetine	Tobacco Use Disorder	22	0.0629994
atomoxetine	Malaria, Falciparum	23	0.062746
atomoxetine	Hepatic Encephalopathy	24	0.0549488
atomoxetine	Sleep Initiation and Maintenance Disorders	25	0.0511252
atomoxetine	Abnormalities, Drug-Induced	26	0.0439446
atomoxetine	Autistic Disorder	27	0.035867
atomoxetine	Pain, Postoperative	28	0.0265861
atomoxetine	Postoperative Complications	29	0.0248339
atomoxetine	Osteoporosis, Postmenopausal	30	0.0208619
atorvastatin	Coronary Artery Disease	1	0.996966
atorvastatin	Diabetes Mellitus, Type 2	2	0.200001
atorvastatin	Hypertension	3	0.199886
atorvastatin	Nutritional and Metabolic Diseases	4	0.19851
atorvastatin	Hyperlipoproteinemia Type II	5	0.192992
atorvastatin	Malaria, Falciparum	6	0.17926
atorvastatin	Gout	7	0.171541
atorvastatin	Hypertension, Malignant	8	0.144206
atorvastatin	Hypokalemia	9	0.130731
atorvastatin	Diabetic Nephropathies	10	0.117138
atorvastatin	Tinea Pedis	11	0.0617444
atorvastatin	Hypoglycemia	12	0.0581801
atorvastatin	Breast Neoplasms	13	0.0343781
atorvastatin	Hypercalcemia	14	0.0333939
atorvastatin	Heart Failure	15	0.0244151
atorvastatin	Adrenal Hyperplasia, Congenital	16	0.0210641
atorvastatin	Hyperaldosteronism	17	0.0137453
atorvastatin	Cushing Syndrome	18	0.0117464
atorvastatin	Thromboembolism	19	0.011156
atorvastatin	Prostatic Hyperplasia	20	0.00904672
atorvastatin	Drug Toxicity	21	0.00856349
atorvastatin	Urinary Tract Infections	22	0.00804894
atorvastatin	Amyloidosis	23	0.00685239
atorvastatin	Toxoplasmosis	24	0.00653878
atorvastatin	Ventricular Dysfunction, Left	25	0.00647375
atorvastatin	Parkinson Disease	26	0.00570388
atorvastatin	Puberty, Precocious	27	0.00464461
atorvastatin	Prostatic Neoplasms	28	0.00388878
atorvastatin	Acne Vulgaris	29	0.00354573
atorvastatin	Hypocalcemia	30	0.00303141
atovaquone	Malaria, Falciparum	1	0.200167
atovaquone	Tinea Pedis	2	0.199901
atovaquone	Rhinitis, Vasomotor	3	0.199862
atovaquone	Diabetes Mellitus, Type 2	4	0.199846
atovaquone	Tinea Versicolor	5	0.199477
atovaquone	Gout	6	0.196471
atovaquone	Skin Diseases, Infectious	7	0.193949
atovaquone	Hepatic Encephalopathy	8	0.190975
atovaquone	Parkinson Disease	9	0.184211
atovaquone	Tinea Capitis	10	0.174871
atovaquone	Osteoporosis, Postmenopausal	11	0.171727
atovaquone	Asthma	12	0.171487
atovaquone	Thromboembolism	13	0.168933
atovaquone	Toxoplasmosis	14	0.159992
atovaquone	Rhinitis	15	0.15989
atovaquone	Psoriasis	16	0.157455
atovaquone	Bipolar Disorder	17	0.15281
atovaquone	Leishmaniasis, Visceral	18	0.149562
atovaquone	Warts	19	0.144813
atovaquone	Amebiasis	20	0.144081
atovaquone	Breast Neoplasms	21	0.143348
atovaquone	Graft vs Host Disease	22	0.139405
atovaquone	Giardiasis	23	0.137596
atovaquone	Malaria, Cerebral	24	0.129477
atovaquone	Osteoarthritis	25	0.128159
atovaquone	Trypanosomiasis	26	0.120512
atovaquone	Malaria, Vivax	27	0.120324
atovaquone	Pneumonia, Pneumocystis	28	0.119648
atovaquone	Pain	29	0.1144
atovaquone	Hypertension	30	0.113703
atropine	Pain	1	0.99923
atropine	Peptic Ulcer	2	0.998543
atropine	Abnormalities, Drug-Induced	3	0.985882
atropine	Rhinitis, Vasomotor	4	0.969309
atropine	Asthma	5	0.6258
atropine	Iridocyclitis	6	0.337355
atropine	Heart Block	7	0.31452
atropine	Tachycardia, Supraventricular	8	0.227564
atropine	Ventricular Fibrillation	9	0.215329
atropine	Parkinson Disease	10	0.214912
atropine	Urinary Incontinence	11	0.212158
atropine	Irritable Bowel Syndrome	12	0.203474
atropine	Schizophrenia	13	0.202552
atropine	Duodenal Ulcer	14	0.200711
atropine	Atrial Fibrillation	15	0.200705
atropine	Cardiac Output, Low	16	0.20025
atropine	Bipolar Disorder	17	0.200167
atropine	Myocardial Infarction	18	0.200156
atropine	Tachycardia, Ventricular	19	0.200135
atropine	Inflammation	20	0.200081
atropine	Angina Pectoris	21	0.200076
atropine	Hypertension	22	0.20003
atropine	Angina Pectoris, Variant	23	0.200022
atropine	Glaucoma, Open-Angle	24	0.200008
atropine	Ventricular Dysfunction, Left	25	0.199987
atropine	Fissure in Ano	26	0.199953
atropine	Atrial Flutter	27	0.199755
atropine	Urinary Retention	28	0.199753
atropine	Vomiting	29	0.199674
atropine	Ventricular Dysfunction	30	0.199652
azatadine	Urticaria	1	0.999999
azatadine	Asthma	2	0.979524
azatadine	Pain	3	0.847173
azatadine	Rhinitis, Vasomotor	4	0.522646
azatadine	Dermatitis, Atopic	5	0.224269
azatadine	Hypertension	6	0.199986
azatadine	Bronchitis	7	0.199714
azatadine	Schizophrenia	8	0.198797
azatadine	Glaucoma, Open-Angle	9	0.195849
azatadine	Edema	10	0.193234
azatadine	Urinary Tract Infections	11	0.191131
azatadine	Conjunctivitis, Allergic	12	0.18791
azatadine	Sinusitis	13	0.171683
azatadine	Inflammation	14	0.10273
azatadine	Motion Sickness	15	0.0768172
azatadine	Respiratory Tract Infections	16	0.0591542
azatadine	Pruritus	17	0.0536132
azatadine	Rhinitis	18	0.0514609
azatadine	Heart Failure	19	0.0513119
azatadine	Dermatitis, Allergic Contact	20	0.0307129
azatadine	Parkinson Disease	21	0.0264027
azatadine	Escherichia coli Infections	22	0.0246182
azatadine	Conjunctivitis, Acute Hemorrhagic	23	0.019086
azatadine	Nausea	24	0.0184886
azatadine	Hypertension, Malignant	25	0.0101352
azatadine	Psoriasis	26	0.00966684
azatadine	Angina Pectoris	27	0.00812994
azatadine	Vomiting	28	0.00744197
azatadine	Ventricular Dysfunction, Left	29	0.00711706
azatadine	Bronchial Spasm	30	0.00687855
azathioprine	Autoimmune Diseases	1	0.269362
azathioprine	Gout	2	0.218333
azathioprine	Leukemia, Lymphocytic, Chronic, B-Cell	3	0.213911
azathioprine	Pemphigoid, Bullous	4	0.212518
azathioprine	Dysentery	5	0.209098
azathioprine	Inflammatory Bowel Diseases	6	0.20905
azathioprine	Pemphigus	7	0.208019
azathioprine	Arthritis, Juvenile Rheumatoid	8	0.203975
azathioprine	Colonic Diseases	9	0.202859
azathioprine	Dermatitis Herpetiformis	10	0.202792
azathioprine	Lymphoma, Non-Hodgkin	11	0.202336
azathioprine	Addison Disease	12	0.202211
azathioprine	Peptic Ulcer	13	0.200864
azathioprine	Malaria, Falciparum	14	0.200619
azathioprine	Gastrointestinal Diseases	15	0.200371
azathioprine	Esophagitis, Peptic	16	0.200089
azathioprine	Giardiasis	17	0.200086
azathioprine	Esophageal and Gastric Varices	18	0.200079
azathioprine	Cryptosporidiosis	19	0.200071
azathioprine	Pruritus	20	0.200052
azathioprine	Osteoarthritis	21	0.20005
azathioprine	Zollinger-Ellison Syndrome	22	0.200005
azathioprine	Stomach Ulcer	23	0.2
azathioprine	Pain	24	0.199993
azathioprine	Asthma	25	0.199991
azathioprine	Urticaria	26	0.199985
azathioprine	Esophageal Neoplasms	27	0.199982
azathioprine	Esophageal Diseases	28	0.199981
azathioprine	Duodenal Ulcer	29	0.199979
azathioprine	Esophagitis	30	0.199937
azelaic acid	Rosacea	1	0.923835
azelaic acid	Psoriasis	2	0.205169
azelaic acid	Malaria, Falciparum	3	0.204905
azelaic acid	Tinea Pedis	4	0.200889
azelaic acid	Tinea Versicolor	5	0.200039
azelaic acid	Diabetes Mellitus, Type 2	6	0.200015
azelaic acid	Hypercholesterolemia	7	0.199995
azelaic acid	Osteoporosis, Postmenopausal	8	0.199945
azelaic acid	Gout	9	0.199772
azelaic acid	Paget Disease, Extramammary	10	0.199367
azelaic acid	Skin Diseases, Infectious	11	0.199361
azelaic acid	Staphylococcal Skin Infections	12	0.19933
azelaic acid	Breast Neoplasms	13	0.197801
azelaic acid	Cushing Syndrome	14	0.196644
azelaic acid	Adenovirus Infections, Human	15	0.19633
azelaic acid	Hepatic Encephalopathy	16	0.195205
azelaic acid	Neutropenia	17	0.194725
azelaic acid	Tinea Capitis	18	0.193732
azelaic acid	Puberty, Precocious	19	0.191661
azelaic acid	Prostatic Hyperplasia	20	0.191384
azelaic acid	Rhinitis, Vasomotor	21	0.190625
azelaic acid	Dermatitis, Seborrheic	22	0.18832
azelaic acid	Nutritional and Metabolic Diseases	23	0.185115
azelaic acid	Glaucoma, Open-Angle	24	0.182931
azelaic acid	Urinary Tract Infections	25	0.18213
azelaic acid	Candidiasis, Vulvovaginal	26	0.172956
azelaic acid	Amebiasis	27	0.169148
azelaic acid	Hypercalcemia	28	0.166459
azelaic acid	Candidiasis, Cutaneous	29	0.163189
azelaic acid	Thrombocytopenia	30	0.162013
azelastine	Urticaria	1	0.999994
azelastine	Asthma	2	0.999467
azelastine	Pain	3	0.983237
azelastine	Conjunctivitis, Allergic	4	0.937777
azelastine	Dermatitis, Atopic	5	0.68104
azelastine	Dermatitis, Allergic Contact	6	0.392656
azelastine	Hypertension	7	0.199998
azelastine	Bronchitis	8	0.199805
azelastine	Schizophrenia	9	0.196535
azelastine	Urinary Tract Infections	10	0.196028
azelastine	Glaucoma, Open-Angle	11	0.195595
azelastine	Edema	12	0.188859
azelastine	Sinusitis	13	0.184541
azelastine	Inflammation	14	0.131781
azelastine	Respiratory Tract Infections	15	0.109395
azelastine	Heart Failure	16	0.0788355
azelastine	Pruritus	17	0.0773645
azelastine	Rhinitis	18	0.0661278
azelastine	Nausea	19	0.0647237
azelastine	Motion Sickness	20	0.0499217
azelastine	Escherichia coli Infections	21	0.0461655
azelastine	Anxiety Disorders	22	0.0334034
azelastine	Bronchial Spasm	23	0.023502
azelastine	Conjunctivitis, Acute Hemorrhagic	24	0.0198713
azelastine	Parkinson Disease	25	0.0168378
azelastine	Sleep Initiation and Maintenance Disorders	26	0.0139752
azelastine	Vomiting	27	0.0127941
azelastine	Ventricular Dysfunction, Left	28	0.0119168
azelastine	Angina Pectoris	29	0.0117427
azelastine	Hypertension, Malignant	30	0.0072245
azithromycin	Gram-Positive Bacterial Infections	1	0.994565
azithromycin	Gonorrhea	2	0.981009
azithromycin	Syphilis	3	0.92141
azithromycin	Bacterial Infections	4	0.907068
azithromycin	Gram-Negative Bacterial Infections	5	0.892113
azithromycin	Actinomycetales Infections	6	0.884814
azithromycin	Whooping Cough	7	0.872468
azithromycin	Eye Infections, Bacterial	8	0.862812
azithromycin	Pneumonia, Mycoplasma	9	0.84093
azithromycin	Erythrasma	10	0.825632
azithromycin	Campylobacter Infections	11	0.822634
azithromycin	Chancroid	12	0.783372
azithromycin	Mycoplasma Infections	13	0.755842
azithromycin	Chlamydiaceae Infections	14	0.748214
azithromycin	Vaginosis, Bacterial	15	0.633251
azithromycin	Impetigo	16	0.574928
azithromycin	Brucellosis	17	0.532182
azithromycin	Legionnaires Disease	18	0.515347
azithromycin	Acne Vulgaris	19	0.478251
azithromycin	Skin Diseases, Bacterial	20	0.477454
azithromycin	Mycobacterium Infections	21	0.423671
azithromycin	Trachoma	22	0.403547
azithromycin	Tularemia	23	0.369462
azithromycin	Rickettsia Infections	24	0.327218
azithromycin	Meningococcal Infections	25	0.321267
azithromycin	Neurosyphilis	26	0.313494
azithromycin	Nocardia Infections	27	0.310767
azithromycin	Otitis Media, Suppurative	28	0.297221
azithromycin	Toxoplasmosis	29	0.295331
azithromycin	Enterobacteriaceae Infections	30	0.280063
aztreonam	Soft Tissue Infections	1	0.999365
aztreonam	Escherichia coli Infections	2	0.998554
aztreonam	Skin Diseases, Bacterial	3	0.997354
aztreonam	Pneumonia, Bacterial	4	0.995764
aztreonam	Proteus Infections	5	0.987047
aztreonam	Haemophilus Infections	6	0.974965
aztreonam	Staphylococcal Infections	7	0.938238
aztreonam	Klebsiella Infections	8	0.870138
aztreonam	Bone Diseases, Infectious	9	0.717738
aztreonam	Osteomyelitis	10	0.710398
aztreonam	Cellulitis	11	0.701994
aztreonam	Postoperative Complications	12	0.489254
aztreonam	Streptococcal Infections	13	0.485188
aztreonam	Wound Infection	14	0.48005
aztreonam	Gonorrhea	15	0.47016
aztreonam	Otitis Media	16	0.427637
aztreonam	Staphylococcal Skin Infections	17	0.362932
aztreonam	Endocarditis, Bacterial	18	0.322926
aztreonam	Bronchitis	19	0.318443
aztreonam	Pharyngitis	20	0.286453
aztreonam	Meningitis, Bacterial	21	0.25526
aztreonam	Impetigo	22	0.232783
aztreonam	Salmonella Infections	23	0.221052
aztreonam	Sepsis	24	0.206345
aztreonam	Serratia Infections	25	0.202696
aztreonam	Gram-Negative Bacterial Infections	26	0.20204
aztreonam	Vaginosis, Bacterial	27	0.200826
aztreonam	Gram-Positive Bacterial Infections	28	0.200206
aztreonam	Listeriosis	29	0.200141
aztreonam	Tinea Pedis	30	0.199936
bacampicillin	Soft Tissue Infections	1	0.99999
bacampicillin	Staphylococcal Infections	2	0.999979
bacampicillin	Pneumonia, Bacterial	3	0.999935
bacampicillin	Skin Diseases, Bacterial	4	0.999702
bacampicillin	Klebsiella Infections	5	0.99395
bacampicillin	Proteus Infections	6	0.993527
bacampicillin	Otitis Media	7	0.662162
bacampicillin	Endocarditis, Bacterial	8	0.617478
bacampicillin	Staphylococcal Skin Infections	9	0.599859
bacampicillin	Wound Infection	10	0.547301
bacampicillin	Bone Diseases, Infectious	11	0.544883
bacampicillin	Postoperative Complications	12	0.542911
bacampicillin	Osteomyelitis	13	0.53283
bacampicillin	Bronchitis	14	0.323822
bacampicillin	Cellulitis	15	0.322775
bacampicillin	Meningitis, Bacterial	16	0.250508
bacampicillin	Impetigo	17	0.221216
bacampicillin	Gram-Positive Bacterial Infections	18	0.215221
bacampicillin	Salmonella Infections	19	0.20496
bacampicillin	Pharyngitis	20	0.204024
bacampicillin	Septicemia	21	0.202883
bacampicillin	Pneumococcal Infections	22	0.201511
bacampicillin	Mycobacterium Infections	23	0.187593
bacampicillin	Pseudomonas Infections	24	0.171593
bacampicillin	Endocarditis, Subacute Bacterial	25	0.165626
bacampicillin	Nocardia Infections	26	0.162176
bacampicillin	Anthrax	27	0.160297
bacampicillin	Gram-Negative Bacterial Infections	28	0.134098
bacampicillin	Candidiasis, Vulvovaginal	29	0.129504
bacampicillin	Actinomycetales Infections	30	0.126382
bacitracin	Eye Infections, Bacterial	1	0.995125
bacitracin	Wound Infection	2	0.645498
bacitracin	Bacterial Infections	3	0.471404
bacitracin	Keratoconjunctivitis, Infectious	4	0.404644
bacitracin	Impetigo	5	0.398872
bacitracin	Gram-Positive Bacterial Infections	6	0.335749
bacitracin	Trachoma	7	0.293669
bacitracin	Conjunctivitis, Viral	8	0.219769
bacitracin	Erythrasma	9	0.208614
bacitracin	Proteus Infections	10	0.208235
bacitracin	Corneal Ulcer	11	0.206075
bacitracin	Nocardia Infections	12	0.206031
bacitracin	Escherichia coli Infections	13	0.205472
bacitracin	Urinary Tract Infections	14	0.205056
bacitracin	Community-Acquired Infections	15	0.20262
bacitracin	Vaginosis, Bacterial	16	0.202479
bacitracin	Bronchitis	17	0.201073
bacitracin	Diverticulitis	18	0.201049
bacitracin	Osteomyelitis	19	0.200873
bacitracin	Pharyngitis	20	0.200323
bacitracin	Bone Diseases, Infectious	21	0.200234
bacitracin	Tinea Capitis	22	0.200211
bacitracin	Skin Diseases, Infectious	23	0.200143
bacitracin	Tinea Pedis	24	0.200017
bacitracin	Tinea Versicolor	25	0.20001
bacitracin	Candidiasis, Vulvovaginal	26	0.199994
bacitracin	Candidiasis, Cutaneous	27	0.199992
bacitracin	Diabetes Mellitus, Type 2	28	0.199982
bacitracin	Pseudomonas Infections	29	0.199971
bacitracin	Septicemia	30	0.199967
baclofen	Neurologic Manifestations	1	0.998308
baclofen	Urinary Bladder, Neurogenic	2	0.980515
baclofen	Dyskinesias	3	0.938751
baclofen	Sleep Disorders	4	0.816879
baclofen	Muscle Rigidity	5	0.771178
baclofen	Muscle Cramp	6	0.76838
baclofen	Psychophysiologic Disorders	7	0.757324
baclofen	Tremor	8	0.704856
baclofen	Parkinson Disease	9	0.702752
baclofen	Epilepsy	10	0.679953
baclofen	Seizures	11	0.628721
baclofen	Fatigue Syndrome, Chronic	12	0.521095
baclofen	Psychomotor Agitation	13	0.509227
baclofen	Pain	14	0.46585
baclofen	Alzheimer Disease	15	0.436229
baclofen	Dyskinesia, Drug-Induced	16	0.433875
baclofen	Brain Edema	17	0.421496
baclofen	Dementia	18	0.389465
baclofen	Spasm	19	0.378487
baclofen	Parkinsonian Disorders	20	0.370063
baclofen	Pain, Postoperative	21	0.358318
baclofen	Brain Neoplasms	22	0.336736
baclofen	Mydriasis	23	0.331624
baclofen	Facial Paralysis	24	0.320564
baclofen	Miosis	25	0.318198
baclofen	Restless Legs Syndrome	26	0.297468
baclofen	Parkinson Disease, Postencephalitic	27	0.295495
baclofen	Intracranial Hypertension	28	0.295031
baclofen	Essential Tremor	29	0.293429
baclofen	Neuroleptic Malignant Syndrome	30	0.281955
balsalazide	Osteoarthritis	1	0.999969
balsalazide	Arthritis, Rheumatoid	2	0.997593
balsalazide	Pain	3	0.983241
balsalazide	Inflammation	4	0.977892
balsalazide	Arthritis, Juvenile Rheumatoid	5	0.856329
balsalazide	Colitis, Ulcerative	6	0.798296
balsalazide	Fever	7	0.312521
balsalazide	Diabetes Mellitus, Type 2	8	0.2601
balsalazide	Gout	9	0.20417
balsalazide	Hypertension	10	0.199983
balsalazide	Asthma	11	0.199404
balsalazide	Dysmenorrhea	12	0.195492
balsalazide	Urinary Tract Infections	13	0.191427
balsalazide	Ventricular Dysfunction, Left	14	0.191142
balsalazide	Schizophrenia	15	0.185682
balsalazide	Diabetic Nephropathies	16	0.185225
balsalazide	Bipolar Disorder	17	0.178944
balsalazide	Osteoporosis, Postmenopausal	18	0.161911
balsalazide	Rhinitis, Vasomotor	19	0.133737
balsalazide	Pruritus	20	0.126906
balsalazide	Angina Pectoris	21	0.115791
balsalazide	Hypertension, Malignant	22	0.111954
balsalazide	Abnormalities, Drug-Induced	23	0.107192
balsalazide	Pain, Postoperative	24	0.0965497
balsalazide	Spondylitis, Ankylosing	25	0.0926874
balsalazide	Arthritis, Gouty	26	0.0743737
balsalazide	Hypercholesterolemia	27	0.0718294
balsalazide	Parkinson Disease	28	0.0573432
balsalazide	Heart Failure	29	0.0521275
balsalazide	Tinea Pedis	30	0.0477013
beclomethasone	Inflammation	1	0.999991
beclomethasone	Leg Dermatoses	2	0.993726
beclomethasone	Hand Dermatoses	3	0.978047
beclomethasone	Scalp Dermatoses	4	0.926161
beclomethasone	Facial Dermatoses	5	0.812716
beclomethasone	Foot Dermatoses	6	0.803984
beclomethasone	Addison Disease	7	0.210415
beclomethasone	Pruritus	8	0.201252
beclomethasone	Psoriasis	9	0.197439
beclomethasone	Glaucoma, Open-Angle	10	0.196662
beclomethasone	Pain	11	0.196409
beclomethasone	Skin Diseases	12	0.196138
beclomethasone	Adrenal Insufficiency	13	0.192128
beclomethasone	Edema	14	0.181382
beclomethasone	Nausea	15	0.169334
beclomethasone	Conjunctivitis, Allergic	16	0.165372
beclomethasone	Acne Vulgaris	17	0.142713
beclomethasone	Iridocyclitis	18	0.116514
beclomethasone	Uveitis, Anterior	19	0.104992
beclomethasone	Hypertension	20	0.0891771
beclomethasone	Respiratory Tract Diseases	21	0.0861443
beclomethasone	Alopecia	22	0.0758768
beclomethasone	Pityriasis Rosea	23	0.0542867
beclomethasone	Schizophrenia	24	0.0403323
beclomethasone	Hirsutism	25	0.0374467
beclomethasone	Motion Sickness	26	0.0359849
beclomethasone	Cough	27	0.0350258
beclomethasone	Diabetes Mellitus, Type 2	28	0.0240071
beclomethasone	Bronchial Spasm	29	0.0234515
beclomethasone	Tinea Pedis	30	0.0135387
benazepril	Hypertension, Malignant	1	0.313329
benazepril	Edema	2	0.192075
benazepril	Nephrotic Syndrome	3	0.175206
benazepril	Myocardial Infarction	4	0.102366
benazepril	Bartter Syndrome	5	0.0729993
benazepril	Pain	6	0.0528035
benazepril	Angina Pectoris	7	0.0444593
benazepril	Schizophrenia	8	0.0364076
benazepril	Urinary Tract Infections	9	0.0356575
benazepril	Asthma	10	0.0310285
benazepril	Drug Toxicity	11	0.01349
benazepril	Abnormalities, Drug-Induced	12	0.0105361
benazepril	Parkinson Disease	13	0.00713229
benazepril	Arthritis, Rheumatoid	14	0.00678081
benazepril	Diabetes Mellitus, Type 2	15	0.00367233
benazepril	Tachycardia, Supraventricular	16	0.00286245
benazepril	Osteoarthritis	17	0.00253331
benazepril	Urinary Retention	18	0.00241847
benazepril	Atrial Fibrillation	19	0.00219549
benazepril	Bipolar Disorder	20	0.00206073
benazepril	Inflammation	21	0.000929465
benazepril	Epilepsies, Partial	22	0.000610252
benazepril	Glaucoma, Open-Angle	23	0.00053656
benazepril	Escherichia coli Infections	24	0.00032828
benazepril	Tinea Pedis	25	0.000273002
benazepril	Prostatic Hyperplasia	26	0.000247862
benazepril	Bronchitis	27	0.000185685
benazepril	Ventricular Fibrillation	28	0.000180634
benazepril	Urinary Bladder Diseases	29	0.000171847
benazepril	Ascites	30	0.000150424
bendroflumethiazide	Hypertension, Malignant	1	0.200077
bendroflumethiazide	Diabetic Nephropathies	2	0.199994
bendroflumethiazide	Asthma	3	0.199607
bendroflumethiazide	Pain	4	0.182689
bendroflumethiazide	Schizophrenia	5	0.178348
bendroflumethiazide	Myocardial Infarction	6	0.172415
bendroflumethiazide	Urinary Tract Infections	7	0.167148
bendroflumethiazide	Ventricular Dysfunction, Left	8	0.166079
bendroflumethiazide	Diabetes Mellitus, Type 2	9	0.140497
bendroflumethiazide	Bipolar Disorder	10	0.101455
bendroflumethiazide	Glaucoma, Open-Angle	11	0.0572935
bendroflumethiazide	Angina Pectoris	12	0.024092
bendroflumethiazide	Liver Cirrhosis	13	0.0155598
bendroflumethiazide	Ascites	14	0.0110782
bendroflumethiazide	Arthritis, Rheumatoid	15	0.0103718
bendroflumethiazide	Parkinson Disease	16	0.00703873
bendroflumethiazide	Malaria, Falciparum	17	0.00601098
bendroflumethiazide	Drug Toxicity	18	0.00488593
bendroflumethiazide	Hypercholesterolemia	19	0.00468976
bendroflumethiazide	Epilepsies, Partial	20	0.00460476
bendroflumethiazide	Alzheimer Disease	21	0.0037583
bendroflumethiazide	Osteoarthritis	22	0.0036715
bendroflumethiazide	Inflammation	23	0.00326604
bendroflumethiazide	Bartter Syndrome	24	0.0026759
bendroflumethiazide	Tachycardia, Supraventricular	25	0.00223538
bendroflumethiazide	Gout	26	0.00223383
bendroflumethiazide	Prostatic Hyperplasia	27	0.00221956
bendroflumethiazide	Depressive Disorder	28	0.00204684
bendroflumethiazide	Urinary Retention	29	0.00195876
bendroflumethiazide	Nutritional and Metabolic Diseases	30	0.00159335
benzocaine	Pain	1	1
benzocaine	Pain, Postoperative	2	0.915808
benzocaine	Toothache	3	0.876916
benzocaine	Epilepsy, Tonic-Clonic	4	0.876594
benzocaine	Facial Pain	5	0.864613
benzocaine	Seizures	6	0.566861
benzocaine	Epilepsies, Partial	7	0.557593
benzocaine	Vomiting	8	0.540313
benzocaine	Hiccup	9	0.455947
benzocaine	Bipolar Disorder	10	0.441344
benzocaine	Diarrhea	11	0.308975
benzocaine	Neurologic Manifestations	12	0.254118
benzocaine	Tachycardia, Supraventricular	13	0.250764
benzocaine	Ventricular Premature Complexes	14	0.244263
benzocaine	Dyspepsia	15	0.244256
benzocaine	Constipation	16	0.244132
benzocaine	Colic	17	0.229499
benzocaine	Epilepsy, Temporal Lobe	18	0.224426
benzocaine	Heartburn	19	0.223296
benzocaine	Muscle Rigidity	20	0.220026
benzocaine	Tachycardia, Ventricular	21	0.219222
benzocaine	Pruritus Ani	22	0.218736
benzocaine	Restless Legs Syndrome	23	0.217764
benzocaine	Anorexia	24	0.21708
benzocaine	Headache	25	0.216404
benzocaine	Muscle Cramp	26	0.215408
benzocaine	Flank Pain	27	0.215102
benzocaine	Psychomotor Agitation	28	0.214922
benzocaine	Edema	29	0.213836
benzocaine	Angina Pectoris, Variant	30	0.212948
benzonatate	Pain	1	0.990175
benzonatate	Epilepsy, Tonic-Clonic	2	0.860088
benzonatate	Epilepsies, Partial	3	0.301282
benzonatate	Tachycardia, Supraventricular	4	0.293034
benzonatate	Bipolar Disorder	5	0.289764
benzonatate	Atrial Fibrillation	6	0.262755
benzonatate	Tachycardia, Ventricular	7	0.219987
benzonatate	Seizures	8	0.215171
benzonatate	Epilepsy, Temporal Lobe	9	0.213786
benzonatate	Atrial Flutter	10	0.206998
benzonatate	Ventricular Fibrillation	11	0.203118
benzonatate	Pruritus	12	0.200454
benzonatate	Pain, Postoperative	13	0.200057
benzonatate	Angina Pectoris	14	0.200036
benzonatate	Schizophrenia	15	0.200012
benzonatate	Psychotic Disorders	16	0.200004
benzonatate	Hypertension	17	0.200003
benzonatate	Alzheimer Disease	18	0.200001
benzonatate	Asthma	19	0.2
benzonatate	Tourette Syndrome	20	0.199999
benzonatate	Parkinson Disease	21	0.199999
benzonatate	Vomiting	22	0.199999
benzonatate	Nausea	23	0.199993
benzonatate	Tremor	24	0.199962
benzonatate	Alcoholism	25	0.19992
benzonatate	Huntington Disease	26	0.199915
benzonatate	Sleep Initiation and Maintenance Disorders	27	0.199901
benzonatate	Torticollis	28	0.199814
benzonatate	Inflammation	29	0.199778
benzonatate	Angina Pectoris, Variant	30	0.199637
benzquinamide	Pain	1	0.999954
benzquinamide	Rhinitis, Vasomotor	2	0.847978
benzquinamide	Rhinitis, Allergic, Perennial	3	0.843935
benzquinamide	Urticaria	4	0.81018
benzquinamide	Abnormalities, Drug-Induced	5	0.678163
benzquinamide	Peptic Ulcer	6	0.62553
benzquinamide	Asthma	7	0.618847
benzquinamide	Pruritus	8	0.303725
benzquinamide	Sleep Initiation and Maintenance Disorders	9	0.212199
benzquinamide	Schizophrenia	10	0.205277
benzquinamide	Parkinson Disease	11	0.202258
benzquinamide	Tachycardia, Supraventricular	12	0.200005
benzquinamide	Angina Pectoris	13	0.199975
benzquinamide	Inflammation	14	0.199921
benzquinamide	Hypertension	15	0.199885
benzquinamide	Alzheimer Disease	16	0.1998
benzquinamide	Tourette Syndrome	17	0.198594
benzquinamide	Glaucoma, Open-Angle	18	0.196877
benzquinamide	Atrial Fibrillation	19	0.195288
benzquinamide	Pain, Postoperative	20	0.193981
benzquinamide	Cardiac Output, Low	21	0.191946
benzquinamide	Tremor	22	0.188178
benzquinamide	Angina Pectoris, Variant	23	0.183271
benzquinamide	Psychomotor Agitation	24	0.183109
benzquinamide	Bronchial Spasm	25	0.17609
benzquinamide	Mydriasis	26	0.171749
benzquinamide	Atrial Flutter	27	0.168895
benzquinamide	Psychotic Disorders	28	0.168836
benzquinamide	Alcoholism	29	0.164333
benzquinamide	Hypotension, Orthostatic	30	0.16247
benzthiazide	Edema	1	0.999998
benzthiazide	Diabetic Nephropathies	2	0.199243
benzthiazide	Asthma	3	0.191492
benzthiazide	Hypertension, Malignant	4	0.181485
benzthiazide	Pain	5	0.110673
benzthiazide	Schizophrenia	6	0.0807844
benzthiazide	Glaucoma, Open-Angle	7	0.0708168
benzthiazide	Diabetes Mellitus, Type 2	8	0.0406155
benzthiazide	Urinary Tract Infections	9	0.020865
benzthiazide	Myocardial Infarction	10	0.0205406
benzthiazide	Bipolar Disorder	11	0.0170832
benzthiazide	Ventricular Dysfunction, Left	12	0.010154
benzthiazide	Angina Pectoris	13	0.00439249
benzthiazide	Parkinson Disease	14	0.00184733
benzthiazide	Malaria, Falciparum	15	0.00151451
benzthiazide	Arthritis, Rheumatoid	16	0.00109667
benzthiazide	Liver Cirrhosis	17	0.00095847
benzthiazide	Ascites	18	0.000810447
benzthiazide	Epilepsies, Partial	19	0.000739904
[truncated: 20,891 more rows]
